# Supplementary material
Source: Research Square preprint supplement (doi:10.21203/rs.3.rs-9203730/v1)
Supplement: Supplementary file 1 [file 38804bbc46a4c78d937a498c.docx]

| **KMO and Bartlett's Test** | | |
| --- | --- | --- |
| Kaiser-Meyer-Olkin Measure of Sampling Adequacy. | | .933 |
| Bartlett's Test of Sphericity | Approx. Chi-Square | 8866.236 |
| df | 703 |
| Sig. | .000 |

| **Communalities** | | |
| --- | --- | --- |
|  | Initial | Extraction |
| EEAS1 | .533 | .509 |
| EEAS2 | .544 | .485 |
| EEAS3 | .638 | .614 |
| EAL1 | .602 | .662 |
| EAL2 | .660 | .730 |
| EAL3 | .660 | .716 |
| EEAS4 | .505 | .483 |
| EAL4 | .603 | .645 |
| AT-AR1 | .409 | .435 |
| AT-AR2 | .602 | .603 |
| AT-AR3 | .477 | .448 |
| AT-AR4 | .666 | .706 |
| AT-AR6 | .492 | .452 |
| EEAS5 | .786 | .800 |
| AT-AR7 | .535 | .511 |
| AT-AR8 | .516 | .502 |
| EEAS6 | .522 | .504 |
| EEAS7 | .535 | .499 |
| EEAS8 | .570 | .516 |
| EEAS9 | .549 | .510 |
| EEAS10 | .438 | .414 |
| HFP-SA1 | .504 | .526 |
| HFP-SA2 | .697 | .851 |
| HFP-SA3 | .547 | .528 |
| AT-AR10 | .681 | .681 |
| EEAS11 | .507 | .459 |
| LD-CAC1 | .518 | .487 |
| LD-CAC2 | .637 | .653 |
| LD-CAC3 | .616 | .581 |
| LD-CAC4 | .553 | .553 |
| LDCAC5 | .465 | .450 |
| LD-CAC6 | .527 | .523 |
| LD-CAC7 | .554 | .538 |
| LD-CAC8 | .624 | .589 |
| LD-CAC9 | .603 | .580 |
| LD-CAC10 | .517 | .503 |
| LD-CAC11 | .566 | .537 |
| LD-CAC12 | .584 | .565 |
| Extraction Method: Principal Axis Factoring. | | |

| **Total Variance Explained** | | | | | | | |
| --- | --- | --- | --- | --- | --- | --- | --- |
| Factor | Initial Eigenvalues | | | Extraction Sums of Squared Loadings | | | Rotation Sums of Squared Loadingsa |
| Total | % of Variance | Cumulative % | Total | % of Variance | Cumulative % | Total |
| 1 | 11.198 | 29.470 | 29.470 | 10.753 | 28.297 | 28.297 | 7.890 |
| 2 | 4.997 | 13.151 | 42.621 | 4.545 | 11.961 | 40.259 | 7.898 |
| 3 | 3.201 | 8.424 | 51.045 | 2.877 | 7.571 | 47.830 | 2.795 |
| 4 | 2.539 | 6.683 | 57.728 | 2.190 | 5.763 | 53.593 | 2.382 |
| 5 | 1.463 | 3.849 | 61.577 | .985 | 2.593 | 56.185 | 8.373 |
| 6 | .883 | 2.323 | 63.900 |  |  |  |  |
| 7 | .794 | 2.090 | 65.990 |  |  |  |  |
| 8 | .700 | 1.842 | 67.832 |  |  |  |  |
| 9 | .674 | 1.772 | 69.604 |  |  |  |  |
| 10 | .652 | 1.716 | 71.321 |  |  |  |  |
| 11 | .636 | 1.674 | 72.994 |  |  |  |  |
| 12 | .605 | 1.591 | 74.585 |  |  |  |  |
| 13 | .594 | 1.564 | 76.150 |  |  |  |  |
| 14 | .563 | 1.482 | 77.631 |  |  |  |  |
| 15 | .555 | 1.459 | 79.091 |  |  |  |  |
| 16 | .543 | 1.429 | 80.520 |  |  |  |  |
| 17 | .528 | 1.389 | 81.909 |  |  |  |  |
| 18 | .498 | 1.310 | 83.219 |  |  |  |  |
| 19 | .484 | 1.274 | 84.493 |  |  |  |  |
| 20 | .440 | 1.157 | 85.649 |  |  |  |  |
| 21 | .421 | 1.109 | 86.758 |  |  |  |  |
| 22 | .411 | 1.081 | 87.839 |  |  |  |  |
| 23 | .393 | 1.035 | 88.874 |  |  |  |  |
| 24 | .384 | 1.011 | 89.885 |  |  |  |  |
| 25 | .371 | .978 | 90.863 |  |  |  |  |
| 26 | .355 | .935 | 91.798 |  |  |  |  |
| 27 | .344 | .907 | 92.705 |  |  |  |  |
| 28 | .331 | .870 | 93.575 |  |  |  |  |
| 29 | .304 | .800 | 94.375 |  |  |  |  |
| 30 | .296 | .778 | 95.153 |  |  |  |  |
| 31 | .287 | .756 | 95.909 |  |  |  |  |
| 32 | .269 | .707 | 96.617 |  |  |  |  |
| 33 | .260 | .685 | 97.301 |  |  |  |  |
| 34 | .238 | .626 | 97.928 |  |  |  |  |
| 35 | .229 | .602 | 98.530 |  |  |  |  |
| 36 | .218 | .573 | 99.104 |  |  |  |  |
| 37 | .178 | .470 | 99.573 |  |  |  |  |
| 38 | .162 | .427 | 100.000 |  |  |  |  |
| Extraction Method: Principal Axis Factoring. | | | | | | | |
| a. When factors are correlated, sums of squared loadings cannot be added to obtain a total variance. | | | | | | | |


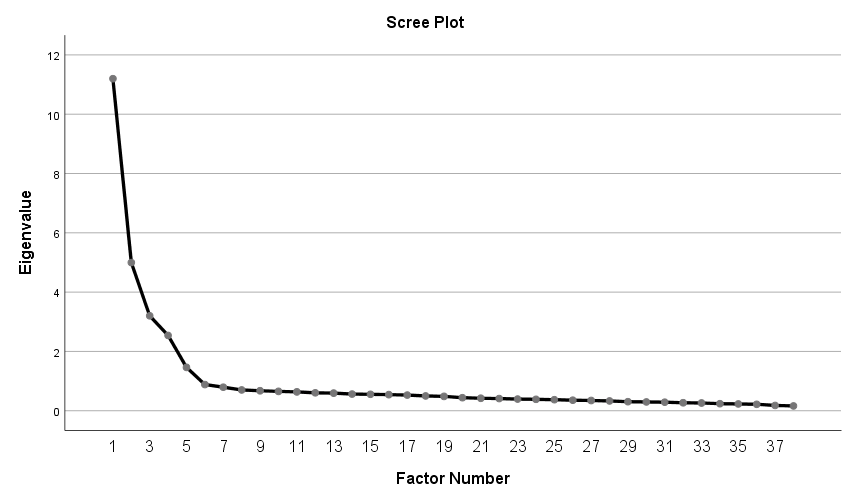


| **Factor Matrixa** | | | | | |
| --- | --- | --- | --- | --- | --- |
|  | Factor | | | | |
| 1 | 2 | 3 | 4 | 5 |
| EEAS1 | .562 |  |  |  |  |
| EEAS2 | .539 |  |  |  |  |
| EEAS3 | .591 |  |  |  |  |
| EAL1 |  |  | .723 |  |  |
| EAL2 |  |  | .656 | -.514 |  |
| EAL3 |  |  | .813 |  |  |
| EEAS4 | .567 |  |  |  |  |
| EAL4 |  |  | .696 |  |  |
| AT-AR1 | .535 |  |  |  |  |
| AT-AR2 | .675 |  |  |  |  |
| AT-AR3 | .602 |  |  |  |  |
| AT-AR4 | .688 |  |  |  |  |
| AT-AR6 | .602 |  |  |  |  |
| EEAS5 | .768 | -.425 |  |  |  |
| AT-AR7 | .639 |  |  |  |  |
| AT-AR8 | .648 |  |  |  |  |
| EEAS6 | .567 |  |  |  |  |
| EEAS7 | .553 |  |  |  |  |
| EEAS8 | .572 |  |  |  |  |
| EEAS9 | .616 |  |  |  |  |
| EEAS10 | .448 |  |  |  |  |
| HFP-SA1 |  |  |  | .602 |  |
| HFP-SA2 |  |  | .520 | .751 |  |
| HFP-SA3 |  |  |  | .610 |  |
| AT-AR10 | .771 |  |  |  |  |
| EEAS11 | .590 |  |  |  |  |
| LD-CAC1 | .550 | .417 |  |  |  |
| LD-CAC2 | .648 | .479 |  |  |  |
| LD-CAC3 | .600 | .460 |  |  |  |
| LD-CAC4 | .505 | .541 |  |  |  |
| LDCAC5 | .447 | .499 |  |  |  |
| LD-CAC6 | .552 | .455 |  |  |  |
| LD-CAC7 | .534 | .493 |  |  |  |
| LD-CAC8 | .557 | .525 |  |  |  |
| LD-CAC9 | .559 | .514 |  |  |  |
| LD-CAC10 | .498 | .501 |  |  |  |
| LD-CAC11 | .525 | .501 |  |  |  |
| LD-CAC12 | .575 | .483 |  |  |  |
| Extraction Method: Principal Axis Factoring. | | | | | |
| a. 5 factors extracted. 10 iterations required. | | | | | |

| **Pattern Matrixa** | | | | | |
| --- | --- | --- | --- | --- | --- |
|  | Factor | | | | |
| 1 | 2 | 3 | 4 | 5 |
| EEAS1 | .690 |  |  |  |  |
| EEAS2 | .639 |  |  |  |  |
| EEAS3 | .706 |  |  |  |  |
| EAL1 |  |  | .814 |  |  |
| EAL2 |  |  | .846 |  |  |
| EAL3 |  |  | .811 |  |  |
| EEAS4 | .510 |  |  |  |  |
| EAL4 |  |  | .799 |  |  |
| AT-AR1 |  |  |  |  | .700 |
| AT-AR2 |  |  |  |  | .723 |
| AT-AR3 |  |  |  |  | .604 |
| AT-AR4 |  |  |  |  | .871 |
| AT-AR6 |  |  |  |  | .595 |
| EEAS5 | .648 |  |  |  |  |
| AT-AR7 |  |  |  |  | .551 |
| AT-AR8 |  |  |  |  | .637 |
| EEAS6 | .615 |  |  |  |  |
| EEAS7 | .636 |  |  |  |  |
| EEAS8 | .619 |  |  |  |  |
| EEAS9 | .594 |  |  |  |  |
| EEAS10 | .725 |  |  |  |  |
| HFP-SA1 |  |  |  | .723 |  |
| HFP-SA2 |  |  |  | .913 |  |
| HFP-SA3 |  |  |  | .724 |  |
| AT-AR10 |  |  |  |  | .546 |
| EEAS11 | .528 |  |  |  |  |
| LD-CAC1 |  | .671 |  |  |  |
| LD-CAC2 |  | .760 |  |  |  |
| LD-CAC3 |  | .740 |  |  |  |
| LD-CAC4 |  | .769 |  |  |  |
| LDCAC5 |  | .686 |  |  |  |
| LD-CAC6 |  | .719 |  |  |  |
| LD-CAC7 |  | .747 |  |  |  |
| LD-CAC8 |  | .765 |  |  |  |
| LD-CAC9 |  | .757 |  |  |  |
| LD-CAC10 |  | .722 |  |  |  |
| LD-CAC11 |  | .717 |  |  |  |
| LD-CAC12 |  | .723 |  |  |  |
| Extraction Method: Principal Axis Factoring.  Rotation Method: Oblimin with Kaiser Normalization. | | | | | |
| a. Rotation converged in 10 iterations. | | | | | |

| **Structure Matrix** | | | | | |
| --- | --- | --- | --- | --- | --- |
|  | Factor | | | | |
| 1 | 2 | 3 | 4 | 5 |
| EEAS1 | .707 |  |  |  | .466 |
| EEAS2 | .658 |  |  |  | .421 |
| EEAS3 | .745 |  |  |  | .492 |
| EAL1 |  |  | .810 |  |  |
| EAL2 |  |  | .836 |  |  |
| EAL3 |  |  | .826 |  |  |
| EEAS4 | .642 |  |  |  | .556 |
| EAL4 |  |  | .801 |  |  |
| AT-AR1 |  |  |  |  | .655 |
| AT-AR2 | .529 |  |  |  | .769 |
| AT-AR3 | .466 |  |  |  | .662 |
| AT-AR4 | .513 |  |  |  | .835 |
| AT-AR6 | .477 |  |  |  | .668 |
| EEAS5 | .856 |  |  |  | .724 |
| AT-AR7 | .531 |  |  |  | .665 |
| AT-AR8 | .465 |  |  |  | .699 |
| EEAS6 | .680 |  |  |  | .522 |
| EEAS7 | .674 |  |  |  | .497 |
| EEAS8 | .685 |  |  |  | .528 |
| EEAS9 | .702 |  |  |  | .549 |
| EEAS10 | .633 |  |  |  |  |
| HFP-SA1 |  |  |  | .724 |  |
| HFP-SA2 |  |  |  | .920 |  |
| HFP-SA3 |  |  |  | .720 |  |
| AT-AR10 | .668 | .407 |  |  | .788 |
| EEAS11 | .650 |  |  |  | .518 |
| LD-CAC1 |  | .690 |  |  |  |
| LD-CAC2 |  | .800 |  |  | .409 |
| LD-CAC3 |  | .757 |  |  |  |
| LD-CAC4 |  | .741 |  |  |  |
| LDCAC5 |  | .667 |  |  |  |
| LD-CAC6 |  | .720 |  |  |  |
| LD-CAC7 |  | .732 |  |  |  |
| LD-CAC8 |  | .766 |  |  |  |
| LD-CAC9 |  | .761 |  |  |  |
| LD-CAC10 |  | .708 |  |  |  |
| LD-CAC11 |  | .726 |  |  |  |
| LD-CAC12 |  | .749 |  |  |  |
| Extraction Method: Principal Axis Factoring.  Rotation Method: Oblimin with Kaiser Normalization. | | | | | |

| **Factor Correlation Matrix** | | | | | |
| --- | --- | --- | --- | --- | --- |
| Factor | 1 | 2 | 3 | 4 | 5 |
| 1 | 1.000 | .238 | -.046 | .056 | .651 |
| 2 | .238 | 1.000 | -.005 | .043 | .424 |
| 3 | -.046 | -.005 | 1.000 | .091 | -.074 |
| 4 | .056 | .043 | .091 | 1.000 | -.038 |
| 5 | .651 | .424 | -.074 | -.038 | 1.000 |
| Extraction Method: Principal Axis Factoring.  Rotation Method: Oblimin with Kaiser Normalization. | | | | | |

Alpha – Factor 1

| **Reliability Statistics** | |
| --- | --- |
| Cronbach's Alpha | N of Items |
| .909 | 11 |

| **Item-Total Statistics** | | | | |
| --- | --- | --- | --- | --- |
|  | Scale Mean if Item Deleted | Scale Variance if Item Deleted | Corrected Item-Total Correlation | Cronbach's Alpha if Item Deleted |
| EEAS1 | 30.52 | 61.159 | .668 | .899 |
| EEAS2 | 30.59 | 61.425 | .616 | .903 |
| EEAS3 | 30.37 | 60.590 | .703 | .898 |
| EEAS4 | 29.81 | 67.747 | .622 | .905 |
| EEAS5 | 30.37 | 58.640 | .830 | .890 |
| EEAS6 | 30.49 | 60.981 | .649 | .901 |
| EEAS7 | 30.39 | 61.514 | .640 | .901 |
| EEAS8 | 30.37 | 61.020 | .651 | .900 |
| EEAS9 | 30.78 | 59.367 | .683 | .899 |
| EEAS10 | 30.22 | 63.828 | .586 | .904 |
| EEAS11 | 30.47 | 61.849 | .628 | .902 |

Factor – 2

| **Reliability Statistics** | |
| --- | --- |
| Cronbach's Alpha | N of Items |
| .933 | 12 |

| **Item-Total Statistics** | | | | |
| --- | --- | --- | --- | --- |
|  | Scale Mean if Item Deleted | Scale Variance if Item Deleted | Corrected Item-Total Correlation | Cronbach's Alpha if Item Deleted |
| LD-CAC1 | 35.41 | 67.146 | .663 | .929 |
| LD-CAC2 | 35.35 | 66.456 | .770 | .925 |
| LD-CAC3 | 35.37 | 66.580 | .728 | .927 |
| LD-CAC4 | 35.37 | 67.289 | .714 | .927 |
| LDCAC5 | 35.42 | 67.335 | .643 | .930 |
| LD-CAC6 | 35.41 | 66.902 | .695 | .928 |
| LD-CAC7 | 35.39 | 67.335 | .705 | .928 |
| LD-CAC8 | 35.38 | 66.628 | .735 | .926 |
| LD-CAC9 | 35.38 | 67.018 | .734 | .927 |
| LD-CAC10 | 35.42 | 67.285 | .681 | .928 |
| LD-CAC11 | 35.40 | 67.058 | .698 | .928 |
| LD-CAC12 | 35.38 | 66.973 | .721 | .927 |

Factor – 3

| **Reliability Statistics** | |
| --- | --- |
| Cronbach's Alpha | N of Items |
| .883 | 4 |

| **Item-Total Statistics** | | | | |
| --- | --- | --- | --- | --- |
|  | Scale Mean if Item Deleted | Scale Variance if Item Deleted | Corrected Item-Total Correlation | Cronbach's Alpha if Item Deleted |
| EAL1 | 11.01 | 4.896 | .751 | .848 |
| EAL2 | 10.87 | 5.617 | .761 | .852 |
| EAL3 | 11.02 | 4.911 | .751 | .848 |
| EAL4 | 11.00 | 4.797 | .745 | .851 |

Factor – 4

| **Reliability Statistics** | |
| --- | --- |
| Cronbach's Alpha | N of Items |
| .745 | 3 |

| **Item-Total Statistics** | | | | |
| --- | --- | --- | --- | --- |
|  | Scale Mean if Item Deleted | Scale Variance if Item Deleted | Corrected Item-Total Correlation | Cronbach's Alpha if Item Deleted |
| HFP-SA1 | 7.71 | 1.165 | .672 | .772 |
| HFP-SA2 | 7.78 | .663 | .724 | .473 |
| HFP-SA3 | 7.87 | .436 | .675 | .650 |

Factor – 5

| **Reliability Statistics** | |
| --- | --- |
| Cronbach's Alpha | N of Items |
| .889 | 8 |

| **Item-Total Statistics** | | | | |
| --- | --- | --- | --- | --- |
|  | Scale Mean if Item Deleted | Scale Variance if Item Deleted | Corrected Item-Total Correlation | Cronbach's Alpha if Item Deleted |
| AT-AR1 | 24.82 | 14.065 | .609 | .882 |
| AT-AR2 | 24.72 | 14.089 | .715 | .871 |
| AT-AR3 | 24.88 | 13.698 | .621 | .881 |
| AT-AR4 | 24.77 | 13.435 | .774 | .864 |
| AT-AR6 | 24.66 | 14.275 | .636 | .878 |
| AT-AR7 | 24.60 | 15.449 | .628 | .881 |
| AT-AR8 | 24.82 | 13.689 | .667 | .875 |
| AT-AR10 | 24.69 | 14.650 | .737 | .871 |

| **Key Code** | **EFA Code** | **Factor – 1 : Ethno-political Ecologies and Agricultural Sustainability** |
| --- | --- | --- |
| **Questions** |
| EEAS1 | EEAS1 | My Ethnic identity influences my farming decisions (Ethnic identity influence on farming) |
| EEAS2 | EEAS2 | My community uses distinct farming techniques (Community farming techniques) |
| EEAS3 | EEAS3 (4) | The *Garo* and Bengali communities differ in sustainability practices (Inter-ethnic sustainability differences). |
| EEAS4 | SCSF1 | I value community welfare in farming decisions (Community welfare orientation). |
| EEAS5 | SCSF3 | During the hard days of crop failure, I am compelled to reduce food intake (Food intake reduction). |
| EEAS6 | HPET4 | Government policies influence my farming decisions (Policy influence on farming decisions). |
| EEAS7 | HPET5 | Land tenure security affects investment decisions (Tenure security and investment). |
| EEAS8 | HPET6 | Political actors influence access to resources – inputs and tools, forest & *Khash* lands (Political influence on resource access). |
| EEAS9 | HPET8 | Local power structures affect resource access (Local power influence on resource access). |
| EEAS10 | LUPC12 | Climate change influences our food choices and farming (Climate influence on food and farming). |
| EEAS11 | FRGS11 | I am concerned about future agricultural resources (Future agricultural resource concern). |

| **Key Code** | **EFA Code** | **Factor – 2 : Livelihood Diversification and Climate Adaptation Capacity (LD-CAC)** |
| --- | --- | --- |
| **Questions** |
| LD-CAC1 | LD1 | In addition to farming, I maintain other sources of income (Non-farm livelihood engagement). |
| LD-CAC2 | LD2 | Besides farming, alternative income sources reduce risks (Risk reduction strategy) |
| LD-CAC3 | LD3 | My family members are engaging in non-farm activities for supporting income ((Non-farm activities and income generation). |
| LD-CAC4 | LD4 | Income from agriculture alone is not sufficient for our family (Agrarian household income vulnerability) |
| LD-CAC5 | LD5 | Diversified livelihoods help us survive in such competitive agrarian setting (Adaptive livelihood strategy). |
| LD-CAC6 | CRP1 | Over the past few years, I have clearly experienced changes in the weather (Experiencing climate change). |
| LD-CAC7 | CRP2 | Climate change is a major threat to overall agriculture (Climate vulnerability in agriculture). |
| LD-CAC8 | CRP3 | Uncertain agricultural seasons are making farming more risky (Seasonal unpredictability and agrarian risk). |
| LD-CAC9 | CRP4 | Floods and droughts have increased compared to the past (Experiencing extreme weather events). |
| LD-CAC10 | CRP5 | I consider climate change a serious problem for crop production (Perceived climate change in crop production). |
| LD-CAC11 | CRP6 | Our preparedness to address climate risks in agriculture is not adequate (Climate resilience inadequacy). |
| LD-CAC12 | CRP7 | Traditional agricultural knowledge is very helpful in coping with the impacts of climate change (Traditional agrarian knowledge and climate resilience). |

| **Key Code** | **EFA Code** | **Factor – 3 : Emotional Attachment to Land** |
| --- | --- | --- |
| **Questions** |
|  | **EAL2** | My land holds ancestral/family members (Ancestral land belonging). |
|  | **EAL3** | I feel distress when the soil fertility of my farming land declines (Moral–affective distress from soil degradation). |
|  | **EAL4** | Farming gives me emotional satisfaction (Embodied cultivation affect). |
|  | **EAL5** | My relationship with the land affects my crop selection (Land relational crop choice). |

| **Key Code** | **EFA Code** | **Factor – 4 : Household Food Provisioning and Sustainable Agriculture** |
| --- | --- | --- |
| **Questions** |
| **HFP-SA1** | **SBBP1** | When market prices are high, I often grow crops for home use (Household provisioning despite market prices). |
| **HFP-SA1** | **SBBP3** | I prefer cultivating staple food crops that support my family's daily needs (Staple-based household food strategy). |
| **HFP-SA1** | **SBBP4** | My homestead garden is primarily for household food and nutritional security (Homestead gardening for food and nutritional security). |

| **Key Code** | **EFA Code** | **Factor – 5 : Agrarian Transformations and Adaptive Repertoires** |
| --- | --- | --- |
| Questions |
| **AT-AR1** | **AAR1** | I adopt new practices after evaluating risks (Risk-embedded innovation). |
| **AT-AR2** | **AAR2** | I choose proven techniques over experimental ones (Technological conservatism). |
| **AT-AR3** | **AAR3** | I calculate costs before making investments in farming (Calculative investment practice). |
| **AT-AR4** | **AAR4** | I rely on logical assessment during an agrarian crisis (Situational crisis rationality). |
| **AT-AR5** | **AAR7** | I rely on hybrid seeds for high yields in my crops (Hybrid technological incorporation). |
| **AT-AR6** | **HPET1** | Farming practices have dramatically changed over the last 20 years (Historical transformations of practice). |
| **AT-AR7** | **HPET2** | Market pressures have altered traditional farming practices (Market reconfiguration of traditional farming). |
| **AT-AR8** | **FRGS5** | Community rules can protect agrarian resources in my village. |
