# Supplementary material
Source: Research Square preprint supplement (doi:10.21203/rs.3.rs-9203730/v1)
Supplement: Supplementary file 2 [file 62f19aa78a350297686cff4c.docx]

**SECTION A: INFORMED CONSENT & LOCATION**

Do you voluntarily agree to participate in this survey? (Yes=1, No=0)

Do you allow the researcher to use your anonymized responses for academic purposes only? (Yes=1, No=0)

Location Village Name: (1 = *Naluapara*, 2 = *Gopalpur*, 3 = *Kakraguni*, 4 = *Beduria*, 5 = *Chondraghona*, and 6 = *Joynagacha*)

**SECTION B: DEMOGRAPHIC AND HOUSEHOLD SOCIO-ECONOMIC BACKGROUND**

Name (optional): ………………………………..

Age: 20-30 (1)/ 31-40 (2)/ 31-50 (3)/ 51 Above (4)

Gender: (1) / Female (2) / Other (3)

Ethnic Identity: *Bengali* (1) / *Garo* (2) / *Mandi* (3)/ Other (4)

Religion: Islam (1), Christian (2), Others (3)

Years of schooling completed: Primary (1), Secondary (2), above (3)

Primary occupation: Agriculture (1), Day Laborer (2), Business (3), Others (4)

Secondary occupation: Laborer (1)/ Business (2)/ Services (3)/ others (4)

Household size: 2-4 (1)/ 5-7 (2)/ 8-10 (3)/ above (4)

Land ownership: Yes (1)/ No (2)

Types of land ownership: Private (1) / Communal (2)/Long-term Contract Lease (3) / Private +Long-Term Contract Lease (4)

Farmland possession: Own (1) / Sharecrop (2) /Long-term Contract Lease (3) /Own+ Sharecrop (4)/ Own+ Long-Term Contract Lease (5)/ Long-Term Contract Lease + sharecrop (6)

Total land owned (Decimal): 10-20 (1)/ 21-30 (2)/ 31-40 (3)/ 41 above (4)

Monthly household income (BTD): 10000-20000 (1)/ 21000-30000 (2)/ 31000-40000 (3)/ 41000 above (4)

Monthly household expenditure (BTD): 10000-20000 (1)/ 21000-30000 (2)/ 31000-40000 (3)/ 41000 above (4)

Household headed by: Male (1) / Female (2)

Formal Loans (Stop if the answer is No): (Yes = 1, No = 2)

Loan amounts (BDT): 10000-20000 (1)/ 21000-30000 (2)/ 31000-40000 (3)/ 41000 above (4)

Informal Loans (Stop if the answer is No): (Yes = 1, No = 2)

18.1. Loan amounts (BDT): 10000-20000 (1)/ 21000-30000 (2)/ 31000-40000 (3)/ 41000 above (4)

**SECTION (C-G): Select 1 = Strongly Disagree, 2 = Disagree, 3 = Agree, and 4 = Strongly Agree**

| **SECTION (C) - Ethno-political ecologies and agricultural sustainability** | | |
| --- | --- | --- |
| EEAS1 | My ethnic identity influences my farming decisions. | 1 2 3 4 |
| EEAS2 | My community uses distinct arming practices. | 1 2 3 4 |
| EEAS3 | The *Garo* and Bengali communities differ in sustainability practices. | 1 2 3 4 |
| EEAS4 | I put value in community welfare in farming decisions. | 1 2 3 4 |
| EEAS5 | During the hard days of crop failure, I follow the rule of the food intake reduction strategy that our community usually follows. | 1 2 3 4 |
| EEAS6 | Government policies strongly influence my farming decisions. | 1 2 3 4 |
| EEAS7 | Land tenure security affects investment decisions in farming. | 1 2 3 4 |
| EEAS8 | Macro political actors influence access to resources. | 1 2 3 4 |
| EEAS9 | Local power structures affect resource access. | 1 2 3 4 |
| EEAS10 | Climate change influences our food choices and farming. | 1 2 3 4 |
| EEAS11 | I am concerned about the exploitative extraction of agricultural resources in the *Sal* forest ecology/Hill land ecology. | 1 2 3 4 |
| **SECTION (D) - Livelihood diversification and climate adaptive capacity** | | |
| LD-CAC1 | In addition to farming, I maintain other sources of income. | 1 2 3 4 |
| LD-CAC2 | Besides farming, we reduce risks through alternative income sources. | 1 2 3 4 |
| LD-CAC3 | My family members are engaging in non-farm activities for supporting income. | 1 2 3 4 |
| LD-CAC4 | Income from agriculture is not alone sufficient for our households. | 1 2 3 4 |
| LD-CAC5 | Diversified livelihoods help us survive in such competitive agrarian settings. | 1 2 3 4 |
| LD-CAC6 | Over the past few years, I have clearly experienced changes in weather. | 1 2 3 4 |
| LD-CAC7 | Climate change is a major threat to overall agriculture. | 1 2 3 4 |
| LD-CAC8 | Unpredictable agricultural seasons are making farming more risky. | 1 2 3 4 |
| LD-CAC9 | Flood/draughts have increased compare to the past. | 1 2 3 4 |
| LD-CAC10 | I consider climate change as a serious problem for crop production. | 1 2 3 4 |
| LD-CAC11 | Our preparedness to address climate risks in agriculture is not adequate. | 1 2 3 4 |
| LD-CAC12 | Traditional agricultural knowledge is very helpful in coping with the impacts of climate change. | 1 2 3 4 |
| **SECTION (E) - Emotional attachment to land** | | |
| EAL1 | My land holds ancestral/family members’ emotion. | 1 2 3 4 |
| EAL2 | I feel distress when the soil fertility of my farming land declines. | 1 2 3 4 |
| EAL3 | Farming gives me emotional satisfaction from my own lands. | 1 2 3 4 |
| EAL4 | My relationships with the land affects my crop selection. | 1 2 3 4 |
| SECTION (F) - Household food provisioning and sustainable agriculture | | |
| HFP-SA1 | When market prices are high, I often grow crops for home use. | 1 2 3 4 |
| HFP-SA2 | I prefer cultivating staple crops that support my family’s daily needs. | 1 2 3 4 |
| HFP-SA3 | My homestead garden is primarily for household food and nutritional security. | 1 2 3 4 |
| **SECTION (G) - Agrarian transformations and adaptive repertoires** | | |
| AT-AR1 | I adapt new technology after evaluating risks. | 1 2 3 4 |
| AT-AR2 | I choose proven techniques over experimental ones. | 1 2 3 4 |
| AT-AR3 | I calculate costs before making investments in farming. | 1 2 3 4 |
| AT-AR4 | I rely on logical assessment during an agrarian crisis. | 1 2 3 4 |
| AT-AR5 | I rely on indigenous knowledge in farming. | 1 2 3 4 |
| AT-AR6 | I rely on hybrid seeds for high yields in my crops. | 1 2 3 4 |
| AT-AR7 | Farming practices have dramatically changed over the last 20 years. | 1 2 3 4 |
| AT-AR8 | Market pressures have altered traditional farming practices. | 1 2 3 4 |
| AT-AR9 | I prefer crop diversity over monoculture. | 1 2 3 4 |
| AT-AR10 | Community rules can protect agrarian resources in my village. | 1 2 3 4 |
