# Supplementary material
Source: Research Square preprint supplement (doi:10.21203/rs.3.rs-9203730/v1)
Supplement: Supplementary file 2 [file 429d3c1510a638c7009789a8.xlsx]

## Sheet: Sheet1
Consent	Data Use Annoimity	Village	Age	Gender	Ethnicity	Religion	Edu. Level	Pri. Occupation	Secon. Occu.	Household Size	Land Ownership	Types of Land	Farmland Possession	Cultivable Land Owned	Monthly Household Income	Monthly Household Expenditure	Household Headed By	Household Loans (Formal)	Amount	Household Loans (Informal)	Amount	EEAS1	EEAS2	EEAS3	EEAS4	EEAS5	EEAS6	EEAS7	EEAS8	EEAS9	EEAS10	EEAS11	LD-CAC1	LD-CAC2	LD-CAC3	LD-CAC4	LD-CAC5	LD-CAC6	LD-CAC7	LD-CAC8	LD-CAC9	LD-CAC10	LD-CAC11	LD-CAC12	EAL1	EAL2	EAL3	EAL4	HFP-SA1
1	1	1	4	1	1	1	1	1	2	3	1	1	5	4	1	1	1	1	3	2		2	2	2	4	2	3	3	3	2	3	2	4	1	2	3	3	3	3	3	3	3	3	3	1	4	1	3	4
1	1	1	3	1	1	1	1	1	4	2	1	1	1	4	2	1	1	1	2	2		2	2	2	4	2	3	3	3	2	3	1	3	3	3	3	3	3	3	3	3	3	3	3	1	4	1	2	2
1	1	1	4	1	1	1	1	1	4	3	1	1	1	4	3	2	1	2		2		2	1	1	4	2	3	4	4	2	3	2	3	3	3	3	3	3	3	3	3	3	3	3	4	4	1	4	2
1	1	1	1	1	1	1	2	1	2	1	1	1	1	4	2	1	1	2		2		2	1	2	4	2	3	4	4	2	3	2	4	3	3	3	3	3	3	3	3	3	3	3	4	4	1	4	2
1	1	1	2	1	1	1	1	1	2	1	1	1	3	4	2	1	1	2		2		2	1	1	4	2	3	3	3	2	3	2	3	3	3	3	3	3	3	3	3	3	3	3	4	4	1	2	4
1	1	1	3	2	1	1	1	4	4	2	1	1	5	4	3	2	1	2		2		2	2	2	4	2	4	4	4	2	3	2	3	3	2	3	3	3	3	3	3	3	3	3	4	4	1	4	4
1	1	1	3	1	1	1	1	1	4	2	1	1	5	4	2	2	1	1	4	2		2	2	1	4	2	3	4	4	2	3	2	4	3	3	3	3	3	3	3	3	3	3	3	1	4	1	2	4
1	1	1	4	1	1	1	1	1	4	2	1	1	1	4	2	1	1	2		1	1	2	1	1	4	2	4	4	3	2	3	2	4	2	4	4	4	4	4	4	4	4	4	4	4	4	4	4	3
1	1	1	1	1	1	1	3	4	4	2	1	1	1	4	3	2	1	2		2		3	2	1	4	2	3	3	3	2	3	2	3	3	3	3	3	3	3	3	3	3	3	3	4	4	4	2	3
1	1	1	4	1	1	1	1	1	4	3	1	1	1	4	2	2	1	2		2		2	1	1	4	2	4	4	4	2	3	2	4	3	1	3	3	3	3	3	3	3	3	3	4	4	4	4	3
1	1	1	4	1	1	1	1	1	4	3	1	1	1	4	2	2	1	2		2		2	1	2	4	2	3	3	4	2	3	2	3	3	3	3	3	3	3	3	3	3	3	3	4	4	4	2	3
1	1	1	4	1	1	1	1	1	4	1	1	1	1	4	2	1	1	2		2		2	2	2	4	2	4	3	4	2	3	2	3	2	3	3	3	3	3	3	3	3	3	3	4	4	4	4	3
1	1	1	2	1	1	1	1	1	4	2	1	1	1	3	2	1	1	2		1	4	2	1	2	4	2	3	3	4	2	4	2	3	3	3	3	3	3	3	3	3	3	3	3	1	4	4	4	4
1	1	1	2	1	1	1	1	1	4	2	2	3	3	4	1	1	1	2		1	4	2	1	1	4	2	3	3	3	2	3	2	4	3	3	3	3	3	3	3	3	3	3	3	4	4	4	4	4
1	1	1	2	1	1	1	2	1	4	1	1	1	1	4	2	2	1	2		2		2	1	1	3	2	4	3	4	2	3	2	3	3	1	3	3	3	3	3	3	3	3	3	4	4	4	4	4
1	1	1	4	1	1	1	2	1	4	3	1	1	1	4	2	2	1	2		2		2	1	1	4	2	3	4	4	2	3	2	3	3	3	3	3	3	3	3	3	3	3	3	4	4	4	4	4
1	1	1	4	1	1	1	1	1	4	1	1	1	1	4	1	1	1	2		2		2	1	2	3	2	3	3	4	2	3	2	3	3	3	3	3	3	3	3	3	3	3	3	4	4	4	4	4
1	1	1	4	1	1	1	1	1	4	1	1	1	1	2	1	1	1	2		2		2	2	1	3	2	4	3	4	2	3	2	4	3	3	3	3	3	3	3	3	3	3	3	1	4	4	4	4
1	1	1	4	1	1	1	2	1	1	2	1	1	1	4	2	1	1	1	4	2		2	1	1	3	2	3	3	3	2	3	2	3	3	3	3	3	3	3	3	3	3	3	3	4	4	4	4	4
1	1	1	3	1	1	1	2	1	4	2	1	1	1	4	1	1	1	1	4	2		2	2	2	3	2	3	3	4	2	3	2	3	3	2	3	3	3	3	3	3	3	3	3	4	4	4	4	4
1	1	1	3	1	1	1	1	1	4	2	1	1	1	4	2	1	1	2		2		2	2	1	3	2	3	3	3	2	3	2	3	3	3	3	3	3	3	3	3	3	3	3	4	4	4	4	4
1	1	1	2	1	1	1	2	1	4	2	1	1	1	4	2	1	1	2		2		2	2	1	3	2	4	4	4	2	3	2	3	3	3	3	3	3	3	3	3	3	3	3	4	4	4	4	4
1	1	1	4	1	1	1	2	1	4	2	1	4	4	2	2	1	1	1	4	2		2	1	1	3	2	3	3	3	2	3	2	3	3	3	3	3	3	3	3	3	3	3	3	4	4	4	4	4
1	1	1	3	1	1	1	2	1	4	2	1	1	5	4	3	2	1	2		2		2	1	2	3	2	4	3	3	2	2	2	2	4	4	4	4	4	4	4	4	4	4	4	1	4	4	4	4
1	1	1	4	1	1	1	1	1	2	1	1	1	1	4	1	1	1	2		2		1	1	1	3	1	1	1	1	3	1	2	4	4	4	4	4	4	4	4	4	4	4	4	4	4	4	4	4
1	1	2	2	2	2	2	2	1	2	2	2	2	3	1	1	1	2	2		1	1	2	2	3	3	3	2	3	3	2	3	2	3	3	2	3	3	3	3	3	3	3	3	3	4	4	4	4	4
1	1	3	4	1	1	1	1	1	1	1	1	3	3	4	2	2	1	2		2		2	2	3	4	2	3	3	3	2	2	2	1	2	3	3	3	3	3	3	3	3	3	3	4	4	4	4	4
1	1	3	2	1	1	1	2	1	1	1	1	3	3	4	3	2	1	2		2		1	2	2	3	1	1	2	2	2	1	2	4	4	4	4	4	4	4	4	4	4	4	4	4	4	4	4	4
1	1	3	4	1	2	2	2	1	3	2	1	3	3	4	1	1	2	1	1	2		2	2	3	4	2	3	3	3	2	3	2	3	3	3	3	3	3	3	3	3	3	3	3	1	4	4	4	4
1	1	4	4	2	2	2	1	1	4	2	1	3	3	4	4	3	2	1	4	2		2	2	2	3	1	1	1	1	1	1	3	3	3	3	3	3	3	3	3	3	3	3	3	4	4	4	4	4
1	1	4	2	2	2	2	1	1	2	1	1	3	3	4	1	1	2	1	2	2		2	2	2	3	3	2	2	2	2	3	2	1	3	3	3	3	3	3	3	3	3	3	3	4	4	3	4	4
1	1	1	2	1	1	1	1	1	4	1	1	1	1	4	2	2	1	1	4	2		2	2	1	3	2	3	4	3	2	3	2	3	2	3	3	3	3	3	3	3	3	3	3	4	4	4	4	4
1	1	1	3	1	1	1	3	1	4	1	1	1	1	4	3	3	1	2		2		2	2	1	4	2	3	3	3	2	3	2	3	3	2	3	3	3	3	3	3	3	3	3	4	4	4	4	4
1	1	1	1	1	1	1	2	1	1	1	1	1	1	3	2	1	1	2		2		2	2	1	4	2	3	3	3	2	3	2	3	3	3	3	3	3	3	3	3	3	3	3	4	4	4	4	4
1	1	1	4	1	1	1	1	1	4	2	1	1	3	1	1	1	1	1	4	2		1	1	2	3	2	3	3	3	2	2	2	3	3	3	3	3	3	3	3	3	3	3	3	1	4	4	4	4
1	1	1	4	1	1	1	1	1	1	2	1	1	1	4	4	4	1	2		2		1	1	1	3	1	1	1	1	1	1	2	4	4	4	4	4	4	4	4	4	4	4	4	4	4	4	4	4
1	1	1	4	1	1	1	2	1	1	2	1	1	4	2	4	3	1	1	3	2	4	2	2	2	4	3	2	3	2	1	1	1	2	4	4	4	4	4	4	4	4	4	4	4	4	4	3	4	4
1	1	1	2	1	1	1	1	1	4	2	1	1	1	4	1	1	1	2		1	3	3	3	3	3	3	1	1	2	1	2	2	3	3	3	3	3	3	3	3	3	3	3	3	4	4	4	4	4
1	1	1	2	1	1	1	3	1	1	1	1	1	1	4	4	3	1	2		2		2	2	2	3	2	2	3	2	1	2	1	3	3	3	3	3	3	3	3	3	3	3	3	4	4	4	4	4
1	1	1	4	1	1	1	1	1	1	2	1	1	1	4	1	1	1	1	4	2		1	2	1	3	4	1	1	1	1	1	1	4	4	1	4	4	4	4	4	4	4	4	4	4	4	4	4	4
1	1	1	4	1	1	1	2	1	4	2	1	1	1	4	2	2	1	2		2		2	2	2	3	1	1	1	1	1	1	2	4	4	4	4	4	4	4	4	4	4	4	4	4	4	4	4	4
1	1	1	1	2	1	1	1	1	1	2	2	2	2	4	2	2	1	1	4	1	4	1	1	1	3	1	1	1	1	1	1	2	4	2	4	4	4	1	4	4	4	4	4	4	4	4	4	4	4
1	1	2	2	2	2	2	1	2	4	2	2	3	3	1	1	1	2	1	4	2		2	3	3	3	3	2	3	3	2	3	2	3	3	3	3	3	3	2	3	3	3	3	3	2	4	3	4	4
1	1	2	4	1	2	2	1	1	2	3	2	2	2	3	1	1	2	2		2		2	3	3	3	3	2	3	3	2	3	2	3	3	3	3	3	3	3	3	3	3	3	3	4	4	4	4	4
1	1	2	4	2	2	2	1	1	4	1	2	2	3	1	1	1	2	2		2		2	3	3	3	3	2	3	3	2	3	2	3	2	3	3	3	3	3	3	3	3	3	3	4	4	4	4	4
1	1	2	2	2	2	2	3	4	4	1	2	3	3	4	2	1	2	2		2		2	3	3	3	3	2	3	3	2	3	2	2	3	3	3	3	2	1	3	3	3	3	3	4	4	4	4	4
1	1	2	4	2	2	2	1	1	2	3	2	3	3	1	1	1	2	2		2		2	3	3	3	3	2	3	3	2	3	2	3	3	3	3	3	3	3	3	3	3	3	3	4	4	4	4	4
1	1	2	4	2	2	2	3	1	4	2	2	3	3	4	4	4	2	1	4	2		2	3	3	3	3	2	3	3	2	3	2	3	2	2	3	3	3	1	3	3	3	3	3	1	3	1	1	4
1	1	2	4	2	2	2	3	1	4	1	2	2	2	1	1	1	2	1	1	2		2	3	3	3	3	2	3	3	2	3	2	1	3	3	3	3	3	3	3	3	3	3	3	1	3	1	1	4
1	1	2	4	2	2	2	3	1	4	1	1	1	1	1	1	1	2	1	1	2		2	2	2	3	3	2	3	3	2	3	2	3	1	3	3	3	3	1	3	3	3	3	3	1	3	1	1	4
1	1	3	2	1	2	2	1	1	4	4	1	3	3	4	1	1	2	1	4	2		2	2	2	3	2	2	1	1	1	3	2	3	3	3	3	3	1	3	3	3	3	3	3	1	3	1	1	4
1	1	3	4	1	2	2	1	1	4	2	1	3	3	4	2	2	2	1	4	2		2	2	2	3	1	1	1	1	3	1	3	1	1	1	1	1	1	1	1	1	1	1	1	1	3	3	1	4
1	1	4	2	1	1	1	1	1	2	2	1	3	3	4	1	1	1	1	4	2		2	2	3	4	2	3	3	3	2	3	2	3	3	3	3	3	3	3	3	3	3	3	3	1	3	1	1	4
1	1	4	2	1	2	2	1	1	4	1	1	3	3	4	4	3	2	2		2		2	2	1	2	1	1	1	1	1	4	1	4	4	4	4	4	4	2	4	4	4	4	4	1	3	1	1	4
1	1	4	1	1	2	2	1	1	4	2	1	2	2	4	1	1	2	2		2		2	2	2	4	2	1	1	1	1	3	2	3	1	3	3	3	1	3	3	3	3	3	3	1	3	1	1	4
1	1	4	4	1	2	2	1	1	4	3	1	3	3	4	3	3	2	1	4	2		2	2	2	3	2	2	3	2	2	3	2	2	3	3	3	3	3	3	3	3	3	3	3	4	4	4	4	4
1	1	4	3	1	2	2	1	1	4	4	1	3	3	4	2	1	2	2		1	4	1	2	2	3	2	2	2	2	2	2	2	3	2	3	3	3	3	3	3	3	3	3	3	4	4	4	1	4
1	1	4	2	2	2	2	1	1	4	3	1	3	3	4	2	1	2	2		2		2	2	2	3	2	2	2	2	2	2	2	2	3	2	3	3	3	3	3	3	3	3	3	3	4	4	4	4
1	1	4	1	2	2	2	1	1	4	2	1	3	6	4	2	1	2	1	4	2		2	2	3	3	3	2	2	2	2	3	2	3	2	3	3	3	2	3	3	3	3	3	3	4	4	4	4	4
1	1	4	2	2	2	2	2	2	2	1	2	1	1	3	3	4	2	1	4	2		3	3	3	2	3	3	2	4	2	3	2	2	3	3	3	3	3	3	3	3	3	3	3	4	4	4	4	4
1	1	4	3	2	2	2	1	1	4	1	1	3	6	2	1	1	2	1	2	2		3	3	3	3	3	3	2	4	2	3	2	3	3	3	3	3	3	3	3	3	3	3	3	4	4	4	4	4
1	1	4	2	1	2	2	1	1	2	1	1	2	2	3	2	2	2	1	4	2		2	2	2	3	3	3	2	2	3	3	3	3	3	3	3	3	3	3	3	3	3	3	3	4	4	4	4	4
1	1	1	4	1	1	1	1	1	4	3	1	1	1	4	2	1	1	2		2		2	1	2	3	3	3	3	3	2	2	2	4	4	2	4	4	4	4	4	4	4	4	4	4	4	4	4	4
1	1	1	4	1	1	1	2	1	4	2	1	1	1	3	2	2	1	2		1	4	2	2	2	3	2	2	2	2	2	3	2	3	3	3	3	3	2	3	3	3	3	3	3	4	4	3	4	4
1	1	1	4	1	1	1	2	1	4	1	1	4	3	2	2	1	1	2		1	4	1	1	2	2	3	2	2	2	1	2	2	3	3	3	3	3	3	3	3	3	3	3	3	3	4	4	4	4
1	1	1	4	1	1	1	1	1	4	2	1	1	1	3	1	1	1	2		2		2	1	2	3	2	2	4	2	1	3	2	3	3	3	3	3	3	3	3	3	3	3	3	4	4	4	4	4
1	1	1	3	1	1	1	1	1	1	2	1	1	1	4	2	1	1	2		1	4	2	1	2	2	2	1	2	2	1	2	2	3	3	2	3	3	3	3	3	3	3	3	3	4	4	4	4	4
1	1	1	3	1	1	1	1	1	1	2	1	1	1	4	2	1	1	2		1	4	2	2	2	3	2	2	2	2	2	2	2	3	3	3	3	3	2	3	3	3	3	3	3	4	4	4	4	4
1	1	1	4	1	1	1	1	1	2	2	1	4	4	4	1	1	1	2		2		1	1	2	2	2	2	3	2	1	2	2	3	3	3	3	3	3	3	3	3	3	3	3	4	4	3	4	4
1	1	1	3	1	1	1	1	1	2	2	1	1	4	3	1	1	1	2		2		2	2	2	3	3	2	2	2	1	3	2	3	3	3	3	3	3	3	3	3	3	3	3	4	4	4	4	4
1	1	1	3	1	1	1	1	1	2	2	2	2	2	2	1	1	1	2		1	4	2	2	2	2	2	2	1	2	1	3	2	3	3	3	3	3	3	3	3	3	3	3	3	3	4	4	4	4
1	1	1	2	1	1	1	1	1	1	2	2	2	2	2	4	1	1	2		2		2	2	2	3	3	1	1	1	1	2	1	3	3	2	3	3	3	3	3	3	3	3	3	4	4	4	4	4
1	1	1	4	1	1	1	2	1	1	2	1	1	1	4	4	3	1	2		1	4	2	2	2	3	3	2	2	2	1	2	2	3	3	3	3	3	1	3	3	3	3	3	3	4	4	4	4	4
1	1	1	3	1	1	1	1	1	2	2	1	1	4	4	1	1	1	1	4	1	4	2	2	2	3	1	1	2	2	1	2	2	4	4	4	4	4	4	4	4	4	4	4	4	4	4	4	4	4
1	1	1	1	1	1	1	1	1	2	3	1	1	4	4	1	1	1	1	4	1	4	1	1	1	3	1	1	1	1	1	1	2	4	4	4	4	4	4	4	4	4	4	4	4	4	4	4	4	4
1	1	1	4	1	1	1	1	1	4	2	1	1	4	4	1	1	1	2		2		2	2	2	2	2	2	1	1	1	3	2	4	4	4	4	4	4	4	4	4	4	4	4	4	4	3	4	4
1	1	1	4	2	1	1	1	4	1	1	1	1	4	1	1	1	1	2		2		2	2	2	3	3	1	1	1	1	1	2	4	4	4	4	4	4	4	4	4	4	4	4	4	4	4	4	4
1	1	1	1	1	1	1	1	1	1	2	2	2	2	4	1	1	1	2		2		3	3	2	3	3	2	3	3	2	2	2	3	3	3	3	3	3	3	3	3	3	3	3	4	4	4	4	4
1	1	2	4	2	2	2	2	1	1	4	2	3	3	4	1	1	2	2		2		3	2	3	3	3	2	2	3	2	3	4	3	2	4	3	1	2	3	3	3	3	3	3	3	2	4	4	4
1	1	2	4	2	2	2	2	1	1	2	1	1	2	4	1	1	2	2		2		3	3	3	3	3	2	3	3	2	2	2	3	3	1	3	3	3	3	3	3	3	3	3	4	2	4	4	4
1	1	2	4	1	2	2	3	1	4	2	1	2	3	4	1	1	2	2		2		2	2	3	3	3	3	2	2	2	3	4	3	3	2	3	3	3	3	3	3	3	1	3	4	2	4	4	4
1	1	2	4	1	2	2	1	1	3	3	1	1	3	4	2	1	2	2		1	4	3	3	3	4	1	2	3	4	1	4	1	2	2	2	2	2	2	2	2	2	1	2	2	4	4	3	4	4
1	1	2	4	2	2	2	1	1	1	2	1	2	3	4	1	1	2	2		1	1	4	4	2	3	1	1	3	1	1	4	2	2	2	2	2	2	2	2	2	2	2	2	2	4	4	4	4	4
1	1	2	1	2	2	2	3	1	3	2	1	2	3	4	1	1	2	2		1	4	4	3	4	3	2	1	1	1	1	4	1	2	2	2	2	2	2	2	2	2	2	2	2	4	4	4	4	4
1	1	2	4	2	2	2	1	1	1	2	1	1	1	4	1	1	2	2		1	4	3	2	2	3	1	2	2	1	1	4	4	2	2	2	2	2	2	2	2	2	2	2	2	4	4	4	4	4
1	1	2	4	1	2	2	1	1	3	2	1	3	3	4	2	2	2	1	4	1	4	2	2	3	4	2	3	3	3	2	3	2	3	3	3	3	3	1	3	3	3	3	1	3	4	4	4	4	4
1	1	3	2	1	1	1	1	1	3	3	1	3	6	4	2	1	1	1	4	1	2	2	2	3	4	2	3	3	3	2	3	2	3	2	3	3	3	3	3	3	3	2	3	1	4	4	4	4	4
1	1	3	2	2	1	1	1	1	1	3	1	3	6	3	1	1	1	1	2	2		2	2	3	4	2	3	3	3	2	3	4	3	3	1	3	1	3	3	3	3	3	2	3	4	4	4	4	4
1	1	3	2	1	1	1	1	1	1	1	1	3	6	4	3	3	1	2		2		2	2	3	4	2	3	3	3	2	3	2	3	3	1	3	4	2	3	3	3	3	3	1	4	4	2	4	4
1	1	3	4	1	1	1	1	1	4	4	1	3	3	4	2	2	1	1	4	2		2	2	3	4	2	3	3	3	2	3	4	3	2	3	3	3	3	3	3	3	3	3	3	4	4	4	4	4
1	1	3	3	1	1	1	1	1	1	1	1	3	3	4	2	1	1	2		2		2	2	3	4	2	3	3	3	2	3	2	3	3	2	4	3	3	3	3	3	3	1	3	4	4	4	4	4
1	1	3	2	1	1	1	1	1	1	2	1	3	3	4	1	1	1	2		2		2	2	3	4	2	3	3	4	2	3	2	3	3	3	3	4	3	3	3	3	3	3	1	4	4	4	4	4
1	1	3	4	1	1	1	1	1	1	2	1	3	3	4	1	1	1	2		2		2	2	3	4	2	3	3	3	2	3	2	3	3	1	3	3	2	3	3	3	1	3	3	2	4	4	4	4
1	1	3	3	1	1	1	1	1	1	3	1	3	3	4	2	2	1	1	4	1	3	2	2	3	4	2	3	3	3	2	3	2	3	2	3	4	4	3	3	3	3	3	2	3	4	4	4	4	4
1	1	3	4	1	1	1	2	1	4	2	1	3	3	4	3	2	1	1	4	2		2	2	3	4	2	3	3	3	2	3	2	3	3	3	3	3	3	3	1	1	3	3	1	4	4	3	4	4
1	1	3	1	2	1	1	3	1	4	1	1	3	3	4	1	1	1	1	2	2		2	2	3	4	2	3	3	3	2	3	4	3	3	3	4	4	1	3	3	1	3	1	3	4	4	4	4	4
1	1	3	1	1	1	1	1	1	4	1	1	3	3	4	2	1	1	1	4	2		2	2	3	4	2	3	3	3	2	3	2	2	2	1	2	2	2	2	2	2	2	2	2	4	4	4	4	4
1	1	3	2	1	1	1	1	1	1	1	1	3	3	4	1	1	1	2		2		2	2	3	4	2	3	3	3	2	3	2	3	2	3	3	3	3	3	3	3	2	3	1	4	4	4	4	4
1	1	3	4	1	1	1	1	1	1	3	1	3	3	4	2	2	1	2		2		2	2	3	4	2	3	3	3	2	3	2	3	3	3	4	4	3	3	2	3	3	2	3	4	4	4	4	4
1	1	3	4	1	2	2	2	1	1	2	1	3	3	4	1	1	2	2		2		2	2	2	4	1	1	1	2	1	2	2	4	4	4	4	4	4	4	4	4	4	4	4	2	4	4	4	4
1	1	3	4	1	2	2	1	1	4	1	1	3	3	4	1	1	2	2		2		2	2	2	3	2	2	2	2	2	3	4	3	3	3	3	4	2	3	3	3	3	2	3	4	4	4	4	4
1	1	3	2	2	2	2	1	1	2	1	1	3	3	4	2	1	2	1	4	2		2	2	2	3	2	2	1	2	1	2	2	3	3	3	4	3	3	3	3	2	2	3	1	4	4	2	4	4
1	1	3	4	1	2	2	1	1	4	1	1	3	3	4	2	1	2	2		2		2	2	2	3	2	2	2	2	2	2	2	3	3	3	3	4	1	3	3	3	2	3	3	4	4	4	4	4
1	1	3	2	1	2	2	1	1	1	4	1	3	3	4	4	3	2	2		2		2	2	2	3	2	2	2	3	1	3	2	3	3	3	4	3	3	3	3	1	3	1	3	4	4	4	4	4
1	1	3	4	1	2	2	1	1	1	3	1	3	3	4	3	2	2	2		2		2	2	2	3	2	2	2	2	2	2	2	3	3	3	3	3	3	3	1	3	1	3	1	4	4	4	4	4
1	1	3	4	1	2	2	2	1	4	2	1	3	3	4	1	1	2	2		2		2	2	2	3	2	2	2	2	1	2	4	3	3	3	3	3	3	3	3	3	3	3	3	2	4	4	4	4
1	1	3	3	1	2	2	2	1	4	1	1	3	3	4	2	1	2	2		1	4	2	2	2	3	2	1	1	1	1	3	2	4	4	4	4	4	4	4	4	4	4	4	4	4	4	4	4	4
1	1	3	4	1	2	2	1	1	1	4	1	3	3	4	2	2	2	1	4	2		2	2	2	3	2	1	1	1	1	3	2	4	4	4	4	4	4	4	4	1	4	4	2	4	4	3	4	4
1	1	3	3	1	2	2	1	1	2	3	1	3	3	4	1	1	2	2		1	4	2	2	2	3	2	1	1	1	1	2	2	4	4	4	4	4	4	4	1	4	1	4	2	4	4	4	4	4
1	1	3	4	1	2	2	1	1	4	3	1	3	3	4	1	1	2	2		1	4	2	2	2	3	2	1	1	1	1	2	2	4	4	4	4	4	4	4	4	4	4	4	4	4	4	4	4	4
1	1	3	3	1	2	2	1	1	4	2	1	3	3	4	1	1	2	2		2		2	2	2	3	2	2	2	2	2	3	2	3	3	3	3	3	3	3	3	3	3	3	3	4	4	4	4	4
1	1	3	4	1	2	2	1	1	1	2	1	3	3	4	1	1	2	2		2		2	2	2	3	2	2	3	2	2	3	4	3	3	3	3	3	3	3	3	1	3	3	3	4	4	4	4	4
1	1	3	2	1	2	2	2	1	4	2	1	3	3	4	1	1	2	2		1	2	4	4	4	3	1	1	1	1	1	2	1	2	2	2	2	2	2	2	2	2	2	2	2	4	4	4	4	4
1	1	3	4	1	2	2	1	1	1	1	1	3	3	4	2	1	2	2		2		3	3	4	4	1	1	1	1	2	2	2	4	4	4	4	4	4	4	4	4	4	4	4	2	4	4	4	4
1	1	3	1	2	2	2	2	1	1	1	1	3	6	2	1	1	2	2		2		4	3	3	3	1	3	3	1	2	3	2	3	3	3	3	3	3	3	1	3	3	3	3	4	4	4	4	4
1	1	3	4	1	2	2	2	1	4	2	1	3	3	4	2	2	2	1	4	2		1	1	2	4	1	1	1	2	1	1	2	3	3	3	3	3	3	3	3	3	3	3	3	2	4	4	4	4
1	1	3	4	1	2	2	1	1	1	3	1	3	3	4	3	3	2	1	4	1	4	2	1	4	4	1	1	1	1	1	1	4	3	3	3	3	3	3	3	3	3	3	3	3	4	4	2	4	4
1	1	4	2	1	1	1	3	1	1	2	1	3	3	4	3	3	1	2		2		2	2	4	4	2	3	4	4	2	3	2	3	3	3	3	3	3	3	3	3	3	3	3	4	4	4	4	4
1	1	4	1	1	1	1	2	3	4	4	1	3	3	4	2	1	1	1	4	2		2	2	3	4	2	3	4	4	2	3	2	3	3	3	3	3	3	3	1	3	3	3	3	4	4	4	4	4
1	1	4	2	2	1	1	1	4	4	2	1	3	3	4	2	2	1	2		2		2	2	3	4	2	4	3	4	2	3	2	3	3	3	3	3	3	3	3	3	3	3	3	4	4	4	4	4
1	1	4	1	1	1	1	1	1	1	1	1	3	3	4	1	1	1	2		2		2	2	3	3	2	4	3	4	2	3	4	3	3	3	3	3	3	3	1	3	3	3	3	4	4	4	4	4
1	1	4	2	1	1	1	1	1	2	2	1	3	3	4	1	1	1	2		2		2	2	3	4	2	3	3	3	2	3	2	2	3	3	3	3	3	3	1	3	3	3	3	3	3	3	1	4
1	1	4	3	1	1	1	1	1	4	2	1	3	3	4	2	2	1	1	4	1	4	2	2	3	4	2	4	3	4	2	3	2	3	3	3	3	3	3	3	3	3	3	3	3	3	3	3	3	4
1	1	4	4	1	1	1	1	1	4	3	1	3	3	4	2	1	1	2		2		2	2	3	4	2	3	3	3	2	3	2	2	2	2	2	2	2	2	2	2	2	2	2	4	3	3	3	4
1	1	4	4	2	1	1	1	4	4	2	1	3	3	4	2	1	1	2		2		2	2	3	4	2	3	3	3	2	3	2	1	3	3	3	3	3	3	3	3	3	3	3	3	3	3	3	4
1	1	4	2	2	1	1	1	4	4	2	1	3	6	4	2	1	1	2		2		2	2	4	4	2	3	3	3	2	3	4	3	3	3	3	1	3	3	3	3	3	3	3	4	3	3	1	4
1	1	4	4	1	1	1	1	1	2	2	1	3	6	3	2	2	1	2		2		2	2	3	4	2	3	3	3	2	3	2	1	4	4	4	4	4	4	4	4	4	4	4	4	4	4	4	4
1	1	4	3	1	1	1	1	1	3	2	1	3	6	3	2	1	1	1	4	2		2	2	3	4	2	3	3	3	2	3	2	2	2	2	2	2	2	2	2	2	2	2	2	2	4	4	4	4
1	1	4	2	1	1	1	1	4	1	1	1	3	4	2	1	1	1	1	4	2		2	2	3	4	2	3	3	3	2	3	2	4	4	4	4	4	4	4	4	4	4	4	4	4	4	4	4	4
1	1	4	3	1	1	1	1	1	1	2	1	3	3	4	3	1	1	1	4	2		2	2	3	4	2	3	3	3	2	3	2	3	3	3	3	3	3	3	3	3	3	3	3	4	4	2	4	4
1	1	4	4	1	2	2	3	1	4	2	1	3	3	4	3	2	2	2		1	4	2	2	2	2	2	2	2	2	2	3	4	3	3	3	3	1	3	3	3	3	3	3	3	4	4	4	4	4
1	1	4	4	2	2	2	1	1	2	3	1	2	6	3	3	2	2	1	4	2		2	2	2	3	2	2	2	2	2	3	2	1	3	3	3	3	3	3	3	3	3	3	3	4	4	4	4	4
1	1	4	4	1	2	2	1	1	4	2	1	3	3	4	1	1	2	2		2		2	2	2	3	1	1	1	1	1	2	1	4	4	4	4	4	4	4	4	4	4	4	4	4	4	4	4	4
1	1	4	3	1	2	2	2	1	4	2	1	3	3	4	1	1	2	2		1	4	2	2	2	3	3	3	3	2	2	3	2	3	1	3	3	3	3	3	3	3	3	3	3	4	4	4	4	4
1	1	4	2	1	2	2	1	1	4	2	1	3	6	3	3	2	2	1	4	1	4	2	2	2	3	2	2	3	2	2	3	2	3	3	3	3	2	3	3	3	3	3	3	3	4	4	4	4	4
1	1	4	3	1	2	2	2	1	4	1	1	3	3	4	2	1	2	1	4	2		2	2	2	3	2	2	3	2	2	2	2	2	3	3	3	3	3	3	3	3	3	3	3	3	4	4	4	4
1	1	4	4	1	2	2	2	1	4	1	1	2	2	4	2	1	2	2		2		2	2	2	3	2	2	2	2	3	3	2	4	4	4	4	4	4	4	4	4	4	4	4	4	4	3	4	4
1	1	4	1	1	2	2	1	1	4	3	1	3	3	4	2	1	2	1	2	1	4	2	2	2	3	2	2	2	2	1	2	4	3	3	3	3	3	3	3	3	3	3	3	3	4	4	4	4	4
1	1	4	4	2	2	2	1	1	4	2	1	3	3	4	2	1	2	1	4	2		2	2	2	2	2	2	2	2	3	3	2	1	1	3	3	3	3	1	3	3	3	3	3	4	4	4	4	4
1	1	4	1	1	2	2	1	1	4	3	1	3	6	3	2	2	2	1	4	1	4	2	2	2	2	1	1	1	1	1	1	2	3	3	3	3	3	3	3	3	3	3	3	3	4	4	4	4	4
1	1	1	4	1	1	1	1	1	2	2	1	1	1	4	4	2	1	1	4	1	4	1	1	1	2	1	1	1	1	1	1	1	1	3	3	3	3	3	3	3	3	3	3	3	4	4	4	4	4
1	1	1	2	1	1	1	1	1	2	2	1	1	1	1	4	3	1	1		1	1	1	1	2	2	1	1	1	2	1	4	2	4	4	4	4	4	4	4	4	4	4	4	4	4	4	4	4	4
1	1	1	4	1	1	1	1	2	1	3	2	1	1	1	4	1	1	2		1	1	2	1	2	2	2	2	1	3	1	3	2	3	3	3	3	3	3	3	3	3	3	3	3	4	4	4	4	4
1	1	1	2	2	1	1	1	1	4	2	1	1	1	1	1	1	1	1	2	2		1	1	1	3	2	2	3	2	2	3	4	1	3	3	3	3	3	3	3	3	3	3	3	4	4	4	4	4
1	1	1	4	1	1	1	1	1	2	2	1	2	2	4	1	1	1	1	4	2		1	1	1	3	2	1	1	1	1	1	2	4	4	4	4	4	4	4	4	4	4	4	4	4	4	4	4	4
1	1	1	4	1	1	1	1	1	3	2	1	1	1	4	1	1	1	2		1	1	2	2	2	3	1	1	1	1	1	1	1	3	3	3	3	3	3	3	3	3	3	3	3	4	4	3	4	4
1	1	2	2	2	2	2	2	1	1	1	1	1	1	4	1	1	2	2		2		2	2	2	2	3	3	3	2	2	3	1	1	1	3	3	3	3	3	3	3	3	3	3	4	4	4	4	4
1	1	2	3	2	2	2	1	1	2	2	1	2	2	4	1	1	2	2		2		3	3	4	2	3	1	1	1	1	3	2	1	1	1	1	1	1	1	1	1	1	1	1	4	4	4	4	4
1	1	2	3	2	2	2	1	1	4	3	1	3	3	4	1	1	2	2		1	4	4	4	3	2	1	3	1	3	4	3	1	2	2	2	2	2	2	2	2	2	2	2	2	4	4	4	4	4
1	1	2	1	1	2	2	3	1	4	3	1	2	3	2	1	1	2	2		1	4	2	1	1	2	3	1	3	1	3	4	4	2	2	2	2	2	2	2	2	2	2	2	2	4	4	4	4	4
1	1	3	2	1	2	2	3	4	4	2	1	3	3	4	4	4	2	2		1	4	2	2	2	4	2	2	4	2	1	3	2	4	4	4	4	4	4	4	4	4	4	4	4	4	4	4	4	4
1	1	3	4	1	2	2	1	1	2	2	1	3	6	3	1	1	2	1	2	2		1	2	1	2	1	1	3	1	1	1	1	3	3	3	3	3	3	3	3	3	3	3	3	4	4	4	4	4
1	1	3	4	1	2	2	1	1	4	3	1	3	3	4	1	1	2	2		2		4	3	4	4	1	4	2	2	2	3	2	2	2	2	2	2	2	2	2	2	2	2	2	4	4	4	4	4
1	1	3	1	1	2	2	1	1	4	4	1	3	3	4	3	2	2	1	4	2		1	1	1	3	1	2	2	1	2	2	3	2	2	2	2	2	2	2	2	2	2	2	2	4	4	4	4	4
1	1	3	2	1	2	2	1	1	4	1	1	3	6	2	2	1	2	1	3	2		1	1	1	3	1	1	1	1	1	1	2	4	4	4	4	4	4	4	4	4	4	4	4	4	4	4	4	4
1	1	4	2	1	1	1	3	1	4	1	1	3	3	4	3	1	1	2		2		2	2	2	3	2	2	3	2	2	3	4	3	3	3	3	3	3	3	3	3	3	3	3	4	4	4	4	4
1	1	4	2	2	2	2	2	1	4	1	1	3	3	4	2	2	2	1	4	2		2	2	2	3	3	3	2	3	2	3	2	3	3	3	3	3	3	3	3	3	3	3	3	4	4	4	4	4
1	1	4	2	1	2	2	1	1	4	2	1	3	3	4	1	1	2	1	4	2		2	3	4	3	3	3	2	2	2	3	2	3	3	3	3	3	3	3	3	3	3	3	3	4	4	4	4	4
1	1	4	3	1	2	2	1	1	4	1	1	3	3	4	1	1	2	2		2		2	3	4	3	3	3	2	2	2	3	2	3	3	3	3	3	3	3	3	3	3	3	3	4	4	4	4	4
1	1	4	2	1	2	2	1	1	4	3	1	3	6	2	2	2	2	1	4	2		3	3	3	4	1	3	1	1	1	4	3	3	3	3	3	3	3	3	3	3	3	3	3	4	4	4	4	4
1	1	4	4	2	2	2	1	1	1	2	1	3	3	4	2	2	2	1	4	2		3	3	3	4	1	1	1	1	1	3	4	3	3	3	3	3	3	3	3	3	3	3	3	4	4	4	4	4
1	1	4	4	2	2	2	1	1	4	1	1	3	3	4	2	2	2	2		2		3	3	3	3	1	1	1	1	1	3	1	3	3	3	3	3	3	3	3	3	3	3	3	4	4	4	4	4
1	1	1	4	1	1	1	1	1	2	2	1	1	4	4	1	1	1	2		2		1	1	1	3	1	1	1	1	1	1	2	4	4	4	4	4	4	4	4	4	4	4	4	4	4	4	4	4
1	1	2	3	2	2	2	1	1	2	2	2	3	3	2	1	1	2	1	4	2		4	4	4	3	1	1	1	3	1	4	2	3	3	3	3	3	3	3	3	3	3	3	3	4	4	4	4	4
1	1	2	4	1	2	2	1	1	4	4	1	2	3	4	1	1	2	1	4	1	4	4	4	4	3	1	1	1	3	1	4	2	3	3	3	3	3	3	3	3	3	3	3	3	4	4	4	4	4
1	1	3	3	2	2	2	2	1	4	2	1	3	3	4	4	4	2	1	4	1	4	4	3	3	3	2	4	4	4	1	4	4	4	4	4	4	4	4	4	4	4	4	4	4	4	4	4	4	4
1	1	3	4	1	2	2	1	1	4	2	1	3	3	4	2	1	2	1	4	2		2	2	1	4	3	1	3	1	1	2	2	2	2	2	2	2	2	2	2	2	2	2	2	4	4	4	4	4
1	1	3	4	1	2	2	1	1	4	2	1	3	6	2	1	1	2	1	1	1	1	1	1	1	3	1	1	3	2	2	3	1	3	3	3	3	3	3	3	3	3	3	3	3	4	4	4	4	4
1	1	4	1	2	2	2	2	1	4	2	1	3	3	4	1	1	2	2		2		2	2	2	4	1	1	1	1	1	2	3	1	1	1	1	1	1	1	1	1	1	1	1	4	4	4	4	4
1	1	4	4	1	2	2	2	1	4	3	1	3	3	4	1	1	2	1	4	2		1	2	1	4	1	1	1	1	1	4	1	1	1	1	1	1	1	1	1	1	1	1	1	4	4	4	4	4
1	1	2	4	2	2	2	2	1	1	2	2	2	3	3	2	1	2	1	1	2		3	3	3	3	2	2	3	3	2	2	2	3	3	3	3	3	3	3	3	3	3	3	3	4	4	4	4	4
1	1	2	3	2	2	2	2	1	3	4	1	2	4	1	1	2	2	2		1	4	2	2	2	4	1	2	3	1	2	2	4	2	2	2	2	2	2	2	2	2	2	2	2	4	4	4	4	4
1	1	2	3	2	2	2	1	1	4	3	1	1	4	1	1	2	1	1	4	1	4	3	4	4	3	3	2	2	1	2	3	3	2	2	2	2	2	2	2	2	2	2	2	2	4	4	4	4	4
1	1	2	1	2	2	2	1	1	3	4	1	3	3	4	1	1	2	1	4	1	4	4	3	2	3	3	1	1	1	1	4	2	1	1	1	1	1	1	1	1	1	1	1	1	4	4	4	4	4
1	1	3	4	2	2	2	1	1	4	2	1	3	3	4	4	4	2	1	4	2		3	4	3	4	1	4	4	3	1	3	1	4	4	4	4	4	4	4	4	4	4	4	4	4	4	4	4	4
1	1	4	2	2	2	2	1	1	4	3	1	3	6	3	3	2	2	1	4	2		2	1	1	3	1	1	3	1	2	2	2	3	3	3	3	1	3	3	3	3	3	3	3	4	4	4	4	4
1	1	1	2	1	1	1	1	1	3	2	1	1	1	4	1	1	1	2		2		2	1	1	3	2	3	3	3	2	3	4	3	3	3	3	3	3	3	3	3	3	3	3	4	4	4	4	4
1	1	2	4	1	2	2	1	1	3	1	2	3	3	2	1	1	2	2		1	4	1	1	1	4	3	2	3	4	1	4	1	1	1	1	1	1	1	1	1	1	1	1	1	4	4	4	4	4
1	1	2	4	2	2	2	1	1	1	2	1	2	2	3	1	2	2	2		2		3	2	1	4	3	2	3	4	1	4	1	1	1	1	1	1	1	1	1	1	1	1	1	4	4	2	4	4
1	1	2	4	1	2	2	1	1	3	2	1	1	1	4	4	3	2	2		1	4	3	4	3	3	1	3	1	1	1	2	2	3	3	3	3	3	3	3	3	3	3	3	3	4	4	4	4	4
1	1	5	4	2	1	1	2	4	4	1	1	1	4	4	4	4	1	1	4	1	3	4	4	4	4	4	4	4	4	4	4	4	4	4	4	4	4	4	4	4	4	4	4	4	4	4	4	4	4
1	1	5	3	2	1	1	1	4	2	2	1	1	4	4	4	4	1	1	4	1	3	4	4	4	4	4	4	4	4	4	4	4	4	4	4	4	4	4	4	4	4	4	4	4	4	4	4	4	4
1	1	5	3	2	1	1	1	4	2	1	1	1	4	4	2	1	1	1	4	1	4	4	4	4	4	4	4	4	4	4	4	4	4	4	4	4	4	4	4	4	4	4	4	4	4	4	4	4	4
1	1	5	3	1	1	1	1	1	3	3	1	1	1	4	4	2	1	1	4	2		4	4	4	4	4	4	4	4	4	4	4	4	4	4	4	4	4	4	4	4	4	4	4	4	4	4	4	4
1	1	5	3	1	1	1	1	1	2	3	1	1	4	4	4	3	1	2		2		2	4	4	4	4	4	4	4	1	4	4	4	4	4	4	4	4	4	4	4	4	4	4	4	4	4	4	4
1	1	5	3	1	1	1	2	1	1	3	1	1	1	4	4	3	1	2		2		4	4	4	4	4	4	4	4	4	4	4	4	4	4	4	4	4	4	4	4	4	4	4	4	4	4	4	4
1	1	5	3	1	1	1	1	1	1	1	1	1	1	4	3	3	1	2		1	4	4	4	4	4	4	4	4	4	4	4	4	4	4	4	4	1	4	4	4	4	4	4	4	4	4	4	4	4
1	1	5	3	1	1	1	3	1	4	1	1	1	4	4	4	3	1	2		2		4	4	4	4	4	1	4	4	4	4	4	4	4	4	4	4	4	4	4	4	4	4	4	4	4	4	4	4
1	1	5	1	1	1	1	1	1	4	1	1	1	4	4	4	4	1	2		2		4	4	4	4	4	4	4	4	4	4	4	4	4	4	4	4	4	4	4	4	4	4	4	4	4	4	4	4
1	1	5	1	1	1	1	1	1	4	2	1	1	1	4	4	4	1	2		1	4	4	4	4	4	4	4	4	4	4	4	1	4	4	4	4	4	4	4	4	4	4	4	4	4	4	4	4	4
1	1	5	1	1	1	1	2	1	4	2	1	1	1	4	4	4	1	2		2		4	4	4	4	4	2	4	4	2	4	4	1	4	4	4	4	4	4	4	4	4	4	4	2	4	4	4	4
1	1	5	1	1	1	1	1	1	4	2	1	1	4	4	4	4	1	1	3	2		4	1	4	4	4	4	4	4	4	4	4	4	4	4	4	4	4	4	4	4	4	4	4	4	4	4	4	4
1	1	5	1	2	1	1	1	4	4	2	1	1	2	4	4	4	1	1	2	1		1	4	4	4	4	4	4	4	4	4	4	4	4	4	2	1	4	4	4	4	4	4	4	4	4	4	4	4
1	1	5	1	2	1	1	1	4	1	1	1	1	4	4	4	4	1	1	2	1	4	4	4	4	4	4	4	4	4	4	4	4	4	4	4	4	4	4	4	4	4	4	4	4	4	4	4	4	4
1	1	5	1	1	1	1	1	1	1	2	1	1	4	4	4	4	1	2		1	4	4	4	4	3	4	4	4	4	4	4	4	1	1	1	1	1	1	1	1	1	1	1	1	4	4	4	4	4
1	1	5	1	1	1	1	1	1	4	1	1	1	1	4	4	4	1	2		2		4	4	4	4	4	2	4	4	4	4	4	4	4	4	4	4	4	4	4	4	4	4	4	4	4	4	4	4
1	1	5	1	1	1	1	1	1	4	3	1	1	4	4	4	4	1	2		2		4	4	4	4	4	4	4	4	4	4	4	4	4	4	4	4	4	4	4	4	4	4	4	4	4	4	4	4
1	1	5	1	1	1	1	1	1	4	2	1	1	4	4	2	1	1	2		2		4	4	4	4	4	4	4	4	1	4	4	4	4	4	4	4	4	4	4	4	4	4	4	4	4	4	4	4
1	1	5	3	1	1	1	1	1	2	2	1	1	1	4	3	2	1	1	4	2		4	2	4	4	4	4	3	4	4	4	4	4	4	4	2	4	4	4	4	4	4	4	4	4	4	2	4	4
1	1	5	3	1	1	1	1	1	4	2	1	1	4	4	2	1	1	1	4	1	4	4	4	4	4	4	4	4	1	4	4	2	1	4	4	4	4	4	4	4	4	4	4	4	4	4	4	4	4
1	1	5	3	1	1	1	3	1	4	2	1	1	4	4	2	1	1	2		2		4	4	4	4	4	4	4	4	4	4	4	1	1	1	1	1	1	1	1	1	1	1	1	4	4	4	4	4
1	1	5	3	1	1	1	3	1	4	2	1	1	1	4	2	1	1	2		2		4	4	4	4	4	4	4	4	4	4	4	4	4	4	4	4	4	4	4	4	4	4	4	4	4	4	4	4
1	1	5	3	2	1	1	3	4	4	2	1	1	4	4	2	2	1	1	3	2		4	4	4	4	4	3	4	4	4	4	4	4	4	4	4	4	4	4	4	4	4	4	4	4	4	4	4	4
1	1	5	3	2	1	1	2	4	1	1	1	1	4	4	3	2	1	1	3	2		4	4	4	4	4	2	4	4	3	4	4	4	4	4	4	4	4	4	4	4	4	4	4	4	4	4	4	4
1	1	5	3	2	1	1	2	4	4	1	1	1	2	4	2	2	1	2		2		4	4	4	4	4	4	4	1	2	4	4	1	4	4	4	4	4	2	4	4	4	4	4	4	4	4	4	4
1	1	5	2	2	1	1	2	1	4	1	1	1	4	4	2	2	1	2		1	4	4	4	4	4	4	4	4	4	4	4	4	4	4	4	4	4	4	1	4	4	4	4	4	4	4	4	4	4
1	1	5	2	2	1	1	2	1	4	2	1	1	4	4	3	2	1	2		2		1	3	4	4	4	4	1	4	4	4	2	4	4	4	2	4	4	4	4	4	4	4	4	4	4	4	4	4
1	1	5	2	2	1	1	1	4	4	2	1	1	4	4	4	4	1	2		2		4	4	4	4	4	4	4	4	4	4	4	4	4	4	4	4	4	1	4	4	4	4	4	4	4	4	1	4
1	1	5	2	2	1	1	1	4	4	2	1	1	1	4	4	4	1	2		1	4	4	4	4	4	4	3	4	4	4	4	4	4	4	4	4	4	4	4	4	4	1	4	4	4	4	4	4	4
1	1	5	2	1	1	1	1	1	4	1	1	1	4	4	4	4	1	2		2		4	4	4	4	4	4	4	4	2	4	4	2	2	2	2	2	2	2	2	2	2	2	2	4	4	3	4	4
1	1	5	2	1	1	1	1	1	1	2	1	1	4	4	4	4	1	1	4	2		4	4	4	4	4	1	4	4	4	4	1	4	4	4	4	4	4	4	4	4	4	4	4	4	4	4	4	4
1	1	5	3	1	1	1	1	1	4	2	1	1	4	4	4	4	1	2		2		4	4	4	4	4	4	4	4	1	4	4	4	4	4	4	4	4	2	4	4	4	4	4	4	4	4	4	4
1	1	5	3	1	1	1	2	1	4	2	1	1	1	4	4	3	1	2		1	4	2	4	4	4	4	4	4	4	4	4	4	4	4	4	4	4	4	4	4	4	4	2	4	4	4	4	4	4
1	1	5	3	1	1	1	2	1	4	2	1	1	4	4	2	1	1	1	2	2		4	1	4	4	4	4	4	1	4	4	4	4	4	4	2	4	4	4	4	4	4	4	4	4	4	4	1	4
1	1	5	4	1	1	1	2	1	4	1	1	1	4	4	2	2	1	2		2		4	4	4	4	4	3	1	4	3	4	3	2	4	4	4	1	4	4	4	4	1	4	4	4	4	4	4	4
1	1	5	4	1	1	1	2	1	1	2	1	1	2	4	2	2	1	2		1		4	4	4	4	4	4	4	4	4	4	4	1	1	1	1	1	1	1	1	1	1	1	1	4	4	4	4	4
1	1	5	4	1	1	1	2	1	4	2	1	1	4	4	2	2	1	1	4	1		4	4	4	4	4	1	4	4	4	4	4	4	4	4	4	4	4	4	4	4	4	4	4	4	4	4	4	4
1	1	5	4	1	1	1	2	1	1	2	1	1	4	4	3	2	1	2		1	4	4	4	4	4	4	4	4	4	4	4	4	4	4	4	4	4	4	4	4	4	4	4	4	4	4	4	4	4
1	1	5	4	1	1	1	1	1	4	3	1	1	4	4	3	2	1	2		2		4	4	4	3	4	4	4	4	4	4	4	4	4	4	4	4	4	4	4	4	1	4	4	4	4	4	4	4
1	1	5	3	1	1	1	1	1	4	2	1	1	4	4	3	2	1	2		2		4	4	4	4	4	4	4	2	1	4	4	4	4	4	1	4	4	4	4	4	4	2	4	4	4	4	1	4
1	1	5	4	1	1	1	1	1	1	1	1	1	4	4	3	2	1	2		2		4	2	4	4	4	3	1	4	3	4	4	1	4	4	4	4	4	1	4	4	4	4	4	4	4	4	4	4
1	1	5	4	1	1	1	1	1	4	3	1	1	1	4	2	1	1	1	3	2		4	4	4	4	4	4	4	4	4	4	4	4	4	4	4	4	4	4	4	4	4	4	4	4	4	4	4	4
1	1	5	4	1	1	1	1	1	1	2	1	1	4	4	2	1	1	2		1	4	4	4	4	4	4	4	4	4	4	4	2	4	4	4	4	4	4	4	4	4	4	4	4	4	4	4	4	4
1	1	5	3	2	1	1	1	4	1	2	1	1	4	4	2	1	1	2		1	4	4	4	4	4	4	4	4	4	4	4	3	4	4	4	4	4	4	4	4	4	2	1	4	4	4	4	4	4
1	1	5	3	2	1	1	1	4	1	1	1	1	4	4	2	1	1	2		2		1	4	4	4	4	4	4	4	4	4	4	4	4	4	4	1	4	4	4	4	4	4	4	2	4	4	4	4
1	1	5	3	2	1	1	1	4	1	1	1	1	4	4	2	1	1	2		2		4	4	4	4	4	2	4	4	4	4	4	4	4	4	4	4	4	4	4	4	4	4	4	4	4	4	1	4
1	1	5	3	2	1	1	3	4	4	2	1	1	4	4	4	3	1	2		2		4	4	4	4	4	4	4	4	4	4	4	2	2	2	2	2	2	2	2	2	2	2	2	4	4	4	4	4
1	1	5	3	2	1	1	3	4	4	2	1	1	4	4	4	3	1	2		2		4	4	4	4	4	3	1	2	2	4	4	2	4	4	4	4	4	4	4	4	4	4	4	4	4	1	4	4
1	1	5	3	2	1	1	3	2	1	2	1	1	4	4	1	1	1	2		2		4	1	4	4	4	4	4	4	3	4	4	4	4	4	4	4	4	4	4	4	4	2	4	4	4	4	4	4
1	1	5	3	2	1	1	2	4	4	2	1	1	4	4	1	1	1	1	3	2		4	4	4	4	4	4	4	4	4	4	4	4	4	4	4	4	4	4	4	4	1	4	4	4	4	4	4	4
1	1	5	3	2	1	1	1	4	4	2	1	1	1	4	1	1	1	2		2		4	4	4	4	4	4	4	4	4	4	4	4	4	4	4	4	4	4	4	4	4	4	4	4	4	4	4	4
1	1	5	4	2	1	1	1	4	1	2	1	1	4	4	1	1	1	2		2		4	4	4	4	4	4	4	4	4	4	3	4	4	4	4	4	4	4	4	4	4	4	4	4	4	4	4	4
1	1	5	3	2	1	1	2	4	4	2	1	1	4	4	4	4	1	2		2		4	4	4	4	4	4	3	4	4	4	4	1	4	4	4	4	4	4	4	4	4	1	4	4	4	4	4	4
1	1	5	3	1	1	1	2	1	4	2	1	1	4	4	1	1	1	2		2		4	4	4	4	4	4	4	1	1	4	4	4	4	4	4	4	4	4	4	4	4	4	4	4	4	4	4	4
1	1	5	3	1	1	1	2	1	1	2	1	1	2	4	2	1	1	2		1	3	4	4	4	4	4	4	4	4	4	4	4	1	1	1	1	1	1	1	1	1	1	1	1	4	4	4	4	4
1	1	5	3	1	1	1	2	1	1	3	1	1	4	4	4	4	1	2		2		2	4	4	4	4	3	4	4	4	4	4	4	4	4	4	4	4	4	4	4	4	4	4	4	4	4	4	4
1	1	5	3	1	1	1	2	1	4	3	1	1	4	4	2	1	1	1	4	1	2	4	4	4	4	4	4	1	4	4	4	4	4	4	4	4	4	4	4	4	4	4	4	4	4	4	4	4	4
1	1	5	3	1	1	1	1	1	4	3	1	1	4	4	2	1	1	2		1	1	4	2	4	4	4	4	4	4	4	4	4	4	4	4	4	4	4	4	4	4	4	4	4	4	4	4	4	4
1	1	5	3	1	1	1	1	1	4	3	1	1	4	4	2	1	1	2		2		4	4	4	4	4	4	4	4	4	4	4	1	4	4	4	4	4	4	4	4	4	3	4	4	4	4	1	4
1	1	5	3	1	1	1	1	1	1	3	1	1	4	4	2	1	1	2		2		4	4	4	4	4	4	2	4	1	4	3	4	4	4	4	4	4	4	4	4	4	4	4	4	4	4	4	4
1	1	5	3	1	1	1	1	1	4	2	1	1	1	4	2	1	1	2		2		4	4	4	4	4	4	4	2	3	4	4	4	4	4	2	4	4	4	4	4	4	4	4	4	4	4	4	4
1	1	5	3	1	1	1	1	1	4	3	1	1	4	4	2	1	1	2		2		2	4	4	4	4	4	4	4	4	4	4	4	4	4	4	4	4	4	4	4	4	4	4	4	4	1	4	4
1	1	5	3	1	1	1	1	1	1	3	1	1	4	4	2	1	1	2		2		4	4	4	4	4	3	4	4	4	4	4	1	2	2	2	2	2	2	2	2	2	1	2	4	4	4	4	4
1	1	5	2	1	1	1	1	1	4	1	1	1	4	4	2	2	1	1	2	2		4	4	4	4	4	4	4	4	4	4	4	4	4	4	4	4	4	4	4	4	4	4	4	4	4	4	4	4
1	1	5	3	1	1	1	1	1	4	1	1	1	4	4	2	1	1	2		1	2	4	4	4	4	4	4	2	4	4	4	4	4	4	4	4	4	4	4	1	1	4	4	4	4	4	4	4	4
1	1	5	3	1	1	1	1	1	1	1	1	1	4	4	2	1	1	2		1	3	4	4	4	4	4	4	3	1	4	4	4	4	4	4	4	4	4	2	4	4	1	2	4	4	4	4	4	4
1	1	5	3	1	1	1	1	1	3	1	1	1	1	4	1	1	1	2		2		4	1	4	4	4	1	4	4	4	4	4	1	4	4	4	4	4	4	4	4	4	4	4	4	4	4	4	4
1	1	5	3	1	1	1	1	1	4	1	1	1	4	4	1	1	1	2		2		4	4	4	3	4	4	4	4	2	4	1	1	1	1	1	1	1	1	1	1	1	1	1	4	4	4	4	4
1	1	5	3	1	1	1	1	1	1	1	1	1	4	4	4	4	1	2		2		2	4	4	4	4	4	4	4	4	4	4	4	4	4	4	4	4	4	4	4	4	4	4	4	4	4	4	4
1	1	5	4	1	1	1	1	1	4	1	1	1	4	4	2	1	1	1	3	1	4	4	4	4	4	4	4	4	4	4	4	4	4	4	4	4	4	4	4	4	4	4	4	4	4	4	4	4	4
1	1	5	4	1	1	1	1	1	4	2	1	1	4	4	2	1	1	1	4	2		4	4	4	4	4	4	4	4	4	4	4	2	4	4	1	4	4	4	4	4	4	4	4	4	4	4	4	4
1	1	5	3	1	1	1	1	1	4	2	1	1	4	4	2	1	1	2		1	4	4	4	4	4	4	3	1	2	4	4	4	4	4	4	4	4	4	1	1	1	2	4	4	4	4	4	4	4
1	1	5	3	1	1	1	2	2	4	2	1	1	4	4	2	1	1	2		2		4	4	4	4	4	4	3	4	3	4	4	4	4	4	4	1	4	4	4	4	4	1	4	4	4	4	1	4
1	1	5	3	1	1	1	2	2	4	2	1	1	1	4	2	2	1	2		2		4	4	4	4	4	4	4	4	4	4	2	1	4	4	4	4	4	4	4	4	4	4	4	2	4	4	4	4
1	1	5	3	1	1	1	2	1	4	2	1	1	4	4	2	1	1	2		2		4	2	4	4	4	4	4	4	4	4	3	4	4	4	4	4	4	4	2	4	4	4	4	4	4	4	4	4
1	1	5	2	1	1	1	1	1	4	3	1	1	4	4	2	1	1	2		1	4	4	4	4	4	4	4	4	4	4	4	4	4	4	4	4	4	4	4	4	2	4	4	4	4	4	4	4	4
1	1	5	2	1	1	1	1	1	1	3	1	1	4	4	2	1	1	1	4	2		4	4	4	4	4	4	4	4	4	4	4	2	2	2	2	2	2	2	2	2	2	2	2	4	4	4	4	4
1	1	5	2	1	1	1	1	1	2	2	1	1	4	4	4	4	1	1	4	2		4	4	4	4	4	4	4	4	2	4	4	4	4	4	2	4	4	4	4	4	2	2	4	4	4	4	4	4
1	1	5	2	1	1	1	1	1	1	4	1	1	4	4	1	1	1	1	3	2		4	4	4	4	4	4	4	1	2	4	4	4	1	4	4	1	4	4	4	4	4	4	4	4	4	4	4	4
1	1	5	4	1	1	1	1	1	4	2	1	1	1	4	2	1	1	1	3	1	3	1	4	4	4	4	4	1	4	4	4	4	4	4	4	4	4	4	4	1	4	4	4	4	4	4	3	4	4
1	1	5	3	1	1	1	1	1	4	2	1	1	4	4	4	4	1	2		2		4	4	4	4	4	3	4	4	4	4	4	4	2	4	4	4	4	2	4	2	4	4	4	4	4	4	4	4
1	1	5	4	1	1	1	3	1	4	2	1	1	4	4	4	4	1	2		2		4	4	4	4	4	1	4	4	4	4	1	2	4	4	4	4	4	4	4	4	4	4	4	4	4	4	4	4
1	1	5	4	1	1	1	3	1	4	2	1	1	4	4	4	4	1	2		2		4	1	4	4	4	4	1	4	4	4	3	1	1	1	1	1	1	1	1	1	1	1	1	4	4	4	4	4
1	1	5	3	1	1	1	3	1	1	3	1	1	4	4	4	4	1	2		2		4	2	4	4	4	4	4	4	1	4	4	4	4	4	1	1	4	4	4	4	1	4	4	4	4	4	4	4
1	1	5	3	1	1	1	1	1	4	3	1	1	4	4	4	4	1	2		2		4	4	4	4	4	4	1	2	1	4	4	4	4	4	4	4	4	4	4	4	4	4	4	4	4	4	4	4
1	1	5	3	1	1	1	1	1	4	3	1	1	1	4	4	4	1	2		1	4	4	4	4	4	4	4	4	4	4	4	4	1	1	4	1	2	4	4	4	4	4	1	4	4	4	4	4	4
1	1	5	3	1	1	1	1	1	1	3	1	1	4	4	2	4	1	2		2		4	4	4	4	4	4	4	4	4	4	4	4	4	4	4	4	4	4	2	1	4	4	4	4	4	4	4	4
1	1	5	3	1	1	1	1	1	4	3	1	1	4	4	3	4	1	2		2		4	2	4	4	4	4	4	4	4	4	4	4	4	4	4	4	4	1	4	4	4	4	4	4	4	4	4	4
1	1	5	3	1	1	1	2	1	4	1	1	1	4	4	3	4	1	2		2		4	4	4	4	4	4	4	4	2	4	4	4	4	4	4	4	4	4	1	2	1	4	4	3	3	3	3	4
1	1	5	3	2	1	1	2	4	4	3	1	1	4	4	4	4	1	2		1	4	4	4	2	3	4	4	1	4	4	4	4	2	1	4	1	4	4	4	4	4	4	4	4	3	3	3	3	4
1	1	5	3	1	1	1	2	1	2	2	1	1	4	4	4	4	1	2		2		1	4	4	4	4	3	4	1	4	4	3	2	2	2	2	2	2	2	2	1	2	2	2	3	3	3	3	4
1	1	5	3	2	1	1	1	4	4	4	1	1	4	4	4	4	1	2		2		4	4	4	4	4	1	3	4	1	4	4	4	4	4	4	4	4	4	4	4	4	4	2	3	3	3	3	4
1	1	5	4	1	1	1	1	1	1	4	1	1	4	4	4	4	1	1	4	2		4	4	4	4	4	4	4	4	4	4	4	4	4	1	4	4	4	1	1	2	2	4	4	3	3	3	3	4
1	1	5	4	2	1	1	1	4	4	3	1	1	4	4	4	4	1	2		2		4	3	4	4	4	4	4	4	4	4	4	1	4	4	4	4	4	4	4	4	4	4	4	3	3	3	3	4
1	1	5	2	1	1	1	1	1	4	2	1	1	2	4	4	4	1	2		2		4	4	2	4	4	4	4	4	3	4	4	4	4	4	2	1	4	4	4	2	4	2	4	3	3	3	3	4
1	1	5	2	1	1	1	1	1	4	2	1	1	4	4	4	4	1	2		1	4	4	4	4	4	4	4	4	4	4	4	4	4	2	4	4	4	4	4	1	4	2	4	4	1	1	1	1	4
1	1	5	2	2	1	1	1	4	4	2	1	1	4	4	4	4	1	2		2		2	4	4	4	4	4	2	4	4	4	1	4	4	4	4	4	4	4	4	4	4	4	1	1	1	1	1	4
1	1	5	1	1	1	1	1	1	3	2	1	1	4	4	4	4	1	1	3	2		4	4	4	4	4	4	1	2	4	4	3	1	1	1	1	1	1	2	1	2	1	1	1	2	1	2	1	4
1	1	5	1	2	1	1	1	4	4	2	1	1	4	4	2	2	1	2		2		4	4	4	4	4	3	4	4	2	4	4	1	4	4	1	4	4	4	4	4	4	4	4	1	1	1	1	4
1	1	5	4	1	1	1	3	1	4	4	1	1	4	4	3	2	1	2		1	4	4	2	4	4	4	4	4	4	4	4	4	4	4	4	4	4	4	4	2	4	4	4	4	1	1	1	1	4
1	1	5	4	2	1	1	2	4	4	4	1	1	4	4	1	1	1	2		2		4	3	2	4	4	4	4	4	1	4	4	4	4	4	4	2	4	4	4	1	4	4	4	1	1	1	1	4
1	1	5	4	1	1	1	1	1	3	2	1	1	4	4	3	3	1	1	4	2		4	4	4	4	4	4	4	4	4	4	4	4	4	1	4	4	4	4	4	2	1	4	2	1	1	1	1	4
1	1	5	4	2	1	1	1	4	4	3	1	1	4	4	4	4	1	1	4	1	4	2	4	4	4	4	1	2	4	4	1	2	2	4	4	4	4	4	4	4	4	4	4	4	1	1	1	1	4
1	1	6	3	1	2	2	1	1	4	2	1	3	3	4	4	2	2	2		2		4	4	4	4	4	4	3	4	4	4	4	4	4	4	4	1	4	1	2	4	4	4	4	1	1	1	1	4
1	1	6	3	1	2	2	1	1	4	4	1	3	3	4	4	2	2	2		1	2	4	1	4	4	4	4	4	4	1	4	4	4	1	4	4	4	4	4	4	4	1	4	4	1	1	1	1	4
1	1	6	3	1	2	2	1	1	4	2	1	3	5	4	4	2	2	2		1	2	3	4	4	4	4	4	4	4	4	4	4	4	4	4	2	4	4	4	1	2	4	4	4	1	1	1	1	4
1	1	6	3	1	2	2	2	1	4	2	1	3	5	4	3	2	2	2		2		2	4	1	4	4	3	4	1	1	1	4	1	4	1	4	4	4	2	4	4	4	4	4	1	1	1	1	4
1	1	6	3	1	2	2	1	2	4	2	1	3	3	4	3	2	2	2		2		4	3	4	4	4	4	4	4	4	4	4	4	4	4	4	4	4	4	4	4	4	4	4	1	1	1	1	4
1	1	6	3	1	2	2	1	2	4	2	1	3	5	4	3	2	2	2		2		4	4	4	4	4	4	4	4	4	4	3	4	4	4	4	1	4	4	2	4	1	4	4	1	1	1	1	4
1	1	6	3	1	2	2	1	2	1	2	1	3	3	4	3	2	2	2		2		4	1	4	4	4	4	4	4	4	4	4	4	1	4	4	4	4	4	4	4	4	4	4	1	1	1	1	4
1	1	6	3	1	2	2	1	2	3	2	1	3	3	4	3	2	2	2		1	3	2	4	4	4	4	4	2	4	4	4	1	2	4	4	1	4	4	1	2	2	4	4	4	4	4	4	4	4
1	1	6	3	1	2	2	1	2	1	2	1	3	5	4	3	2	2	1	4	2		4	4	2	4	4	3	3	4	4	3	4	4	4	1	4	4	4	2	4	4	4	4	4	4	4	4	4	4
1	1	6	3	1	2	2	1	2	1	2	1	3	3	2	3	2	2	1	4	1	4	4	4	4	4	4	4	4	2	2	4	4	4	4	4	4	4	4	4	4	4	4	4	4	4	4	4	4	4
1	1	6	3	1	2	2	2	1	1	2	1	3	3	4	3	2	2	1	3	2		4	4	4	3	4	4	4	4	4	4	4	4	2	4	4	4	4	4	4	4	4	4	1	4	4	4	4	4
1	1	6	3	1	2	2	3	1	1	2	1	3	5	4	3	2	2	1	4	2		4	1	4	4	4	4	4	4	3	4	4	1	4	4	1	1	1	4	1	2	4	4	4	4	4	4	4	4
1	1	6	3	1	2	2	3	1	1	2	1	3	3	4	3	2	2	2		2		4	4	4	4	4	2	4	4	4	4	2	1	2	1	1	1	1	2	1	1	1	1	1	4	1	4	4	4
1	1	6	3	1	2	2	3	1	1	2	1	3	3	3	3	2	2	2		2		3	4	2	4	4	4	1	1	4	2	3	4	4	4	4	4	4	4	4	4	4	4	4	4	1	4	4	4
1	1	6	3	1	2	2	2	1	1	2	1	3	3	4	3	2	2	1	4	2		4	4	4	4	4	4	4	4	4	4	4	4	4	4	4	4	4	4	4	4	4	4	4	4	4	4	4	4
1	1	6	3	1	2	2	2	1	1	2	1	3	5	4	3	2	2	2		1	4	1	4	4	4	4	4	4	4	4	4	4	4	2	4	4	4	4	4	4	2	4	4	4	4	4	4	4	4
1	1	6	3	1	2	2	2	1	4	2	1	3	3	4	3	2	2	2		2		4	2	4	4	4	3	4	4	4	4	4	4	4	4	1	4	4	2	2	4	4	4	2	4	4	4	4	4
1	1	6	3	1	2	2	2	1	4	2	1	3	3	4	3	2	2	2		2		4	4	4	4	4	4	4	4	4	1	4	1	4	4	4	1	4	4	4	4	4	4	4	4	4	4	4	4
1	1	6	3	1	2	2	2	1	4	2	1	3	3	4	3	2	2	2		2		4	3	4	4	4	4	4	4	1	4	1	4	2	1	4	4	4	4	4	4	4	4	4	4	4	4	4	4
1	1	6	3	1	2	2	2	1	4	2	1	3	5	4	3	2	2	2		2		2	4	2	4	4	4	2	4	4	1	4	4	4	4	1	4	1	2	4	4	4	4	4	4	4	4	4	4
1	1	6	3	1	2	2	3	1	4	3	1	3	3	3	3	2	2	2		2		4	4	4	4	4	4	4	4	4	4	4	2	2	2	2	2	2	2	2	2	2	2	2	4	4	4	4	4
1	1	6	3	1	2	2	2	1	4	3	1	3	3	4	3	2	2	2		2		4	1	4	4	4	4	4	4	4	1	4	4	4	4	4	4	4	4	1	4	2	1	4	3	4	4	4	4
1	1	6	3	1	2	2	2	1	4	3	1	3	5	4	4	4	2	2		2		4	4	4	4	4	1	4	3	4	4	4	4	4	4	4	1	4	4	4	4	4	4	4	4	4	4	4	4
1	1	6	3	1	2	2	2	1	4	3	1	3	3	4	4	4	2	2		1	4	4	4	4	4	4	1	4	4	4	3	4	4	1	4	2	4	4	1	4	4	4	4	4	4	4	4	4	4
1	1	6	3	1	2	2	2	1	4	3	1	3	3	4	4	4	2	2		1	4	4	4	4	4	4	4	4	4	4	4	4	4	4	4	4	4	1	4	4	4	4	4	2	4	4	4	4	4
1	1	6	3	1	2	2	2	1	4	3	1	3	5	4	4	4	2	2		1	3	4	2	4	4	4	4	4	4	1	4	2	4	4	4	4	4	4	4	2	2	2	4	4	4	4	3	4	4
1	1	6	3	1	2	2	2	1	4	3	1	3	5	3	4	4	2	2		1	3	3	4	4	4	4	4	4	4	4	4	4	4	4	1	2	4	4	4	4	4	4	2	4	4	4	4	4	4
1	1	6	3	1	2	2	2	1	4	3	1	3	5	4	4	3	2	2		1	2	4	4	4	4	4	4	3	3	4	1	4	4	1	4	4	4	1	1	4	4	4	4	4	4	4	4	1	4
1	1	6	3	1	2	2	2	1	4	3	1	3	3	4	4	2	2	2		1	1	1	4	4	4	4	1	1	4	4	4	4	4	4	4	1	4	4	4	4	2	4	4	2	4	4	4	4	4
1	1	6	3	1	2	2	2	1	4	3	1	3	3	4	4	4	2	1	4	1	2	4	4	4	4	4	4	4	4	4	3	4	4	2	4	4	1	4	4	4	4	4	4	4	4	4	4	4	4
1	1	6	3	2	2	2	2	4	4	3	1	3	3	4	4	4	2	2		1	1	4	1	3	3	4	4	4	4	4	4	4	4	4	4	4	4	4	4	1	4	1	2	4	4	4	4	4	4
1	1	6	3	2	2	2	2	4	4	2	1	3	5	4	4	4	2	2		1	2	1	1	4	4	4	4	4	4	4	4	4	4	4	4	4	4	1	2	4	4	4	4	4	4	4	4	4	4
1	1	6	3	1	2	2	2	1	3	2	1	3	5	4	4	4	2	2		2		4	4	4	4	4	4	4	4	1	4	4	4	4	4	4	4	1	4	4	4	4	4	4	4	4	4	4	4
1	1	6	3	1	2	2	2	1	4	3	1	3	5	4	4	3	2	2		2		4	4	4	4	4	4	4	4	4	1	1	1	2	4	2	4	4	4	4	1	4	4	4	4	4	4	4	4
1	1	6	3	1	2	2	2	1	4	2	1	3	5	4	1	1	2	2		2		4	1	4	4	4	4	4	4	2	4	4	4	4	1	4	4	4	4	4	4	4	1	1	4	4	4	4	4
1	1	6	3	1	2	2	2	1	4	2	1	3	5	4	1	1	2	2		2		4	4	4	4	4	1	2	3	4	4	4	4	4	4	4	1	2	4	2	4	2	4	4	4	4	4	4	4
1	1	6	3	1	2	2	2	1	4	1	1	3	3	3	2	1	2	1	3	2		1	4	4	4	4	2	4	4	4	1	4	1	1	1	1	1	1	1	1	1	1	1	1	4	4	4	4	4
1	1	6	3	2	2	2	2	4	4	2	1	3	3	4	2	1	2	1	2	2		3	4	4	4	4	4	2	4	4	4	4	4	4	4	4	4	4	4	4	4	4	4	4	4	4	4	4	4
1	1	6	3	1	2	2	2	1	1	2	1	3	3	4	2	1	2	1	4	2		4	4	3	4	4	4	4	2	4	4	4	4	4	4	4	4	4	4	4	2	4	4	4	4	4	4	4	4
1	1	6	3	1	2	2	2	1	1	2	1	3	3	3	2	1	2	1	4	2		4	1	4	4	4	4	4	4	1	4	4	4	4	4	4	4	4	1	1	4	4	4	2	4	4	4	4	4
1	1	6	3	1	2	2	1	1	1	2	1	3	5	4	1	1	2	1	4	2		4	4	4	4	4	4	1	4	4	1	2	4	4	4	1	4	1	4	4	4	1	4	4	4	4	4	4	4
1	1	6	3	2	2	2	1	4	1	2	1	3	3	4	1	1	2	2		2		4	4	4	4	4	4	4	3	4	1	4	4	4	4	4	4	4	4	4	4	4	4	4	4	4	4	1	4
1	1	6	3	1	2	2	2	1	1	2	1	3	3	4	1	1	2	2		2		3	4	4	4	4	4	4	4	4	4	4	4	4	4	4	4	4	2	4	1	4	1	4	4	4	4	4	4
1	1	6	3	1	2	2	1	1	1	3	1	3	5	2	1	1	2	2		2		4	4	4	4	4	4	4	4	1	4	4	4	4	4	4	1	4	4	4	4	4	4	2	4	4	4	4	4
1	1	6	3	2	2	2	1	4	1	2	1	3	5	4	1	1	2	2		2		4	4	4	4	4	1	4	4	4	4	4	4	4	4	4	4	2	4	1	4	4	4	4	4	4	4	4	4
1	1	6	3	1	2	2	2	1	1	3	1	3	5	4	2	1	2	2		2		4	4	3	4	4	4	4	4	4	4	4	4	4	2	4	4	4	4	4	4	4	4	4	4	4	4	4	4
1	1	6	3	1	2	2	1	1	3	3	1	3	5	4	3	2	2	1	4	2		4	1	4	4	4	4	4	4	4	1	4	4	4	4	4	4	4	1	4	4	2	4	4	3	4	4	4	4
1	1	6	3	2	2	2	1	1	3	3	1	3	5	4	3	2	2	1	4	2		1	4	4	4	4	4	4	4	4	4	1	4	4	4	4	4	4	4	1	2	4	1	4	4	4	3	4	4
1	1	6	3	1	2	2	1	1	3	3	1	3	5	4	3	2	2	1	3	2		4	4	4	4	4	4	4	3	4	4	4	4	4	4	4	1	4	4	4	4	4	4	1	4	4	4	4	4
1	1	6	3	1	2	2	1	1	4	3	1	3	5	4	3	2	2	1	4	2		4	4	4	3	4	4	1	4	4	3	4	4	4	4	4	4	4	2	4	4	4	4	4	4	4	4	4	4
1	1	6	3	1	2	2	1	1	4	3	1	3	3	3	3	2	2	1	3	2		4	4	4	4	4	4	4	4	1	4	4	4	4	4	4	4	1	4	2	4	4	4	4	4	4	4	4	4
1	1	6	3	1	2	2	1	1	4	3	1	3	3	4	3	2	2	1	3	2		1	4	3	4	4	1	4	4	4	4	4	4	4	4	2	4	4	4	4	4	1	4	4	4	4	4	4	4
1	1	6	3	1	2	2	1	1	4	3	1	3	3	4	3	2	2	1	3	2		4	1	4	4	4	4	4	4	1	4	2	1	1	1	1	1	1	1	1	1	1	1	1	4	4	4	4	4
1	1	6	3	1	2	2	1	1	4	1	1	3	3	4	3	2	2	1	3	2		4	4	4	4	4	4	4	4	4	1	4	2	2	2	2	1	2	1	2	2	2	2	2	4	4	4	4	4
1	1	6	3	1	2	2	2	1	4	1	1	3	3	4	3	2	2	1	3	2		4	4	4	4	4	4	4	3	4	2	4	4	4	1	4	4	4	4	4	4	4	4	4	4	4	4	4	4
1	1	6	3	2	2	2	1	4	1	1	1	3	3	4	3	2	2	2		2		1	4	4	4	4	4	2	4	2	4	4	4	4	4	4	4	1	4	4	4	2	4	4	4	4	4	4	4
1	1	6	3	2	2	2	2	4	1	1	1	3	3	4	3	2	2	1	2	2		4	4	4	4	4	4	4	4	4	4	4	4	4	4	4	4	4	4	4	4	4	4	4	4	4	4	4	4
1	1	6	3	2	2	2	2	4	1	1	1	3	5	2	3	2	2	1	2	2		4	2	4	4	4	2	4	4	4	4	4	4	4	4	4	2	4	2	4	2	4	2	4	4	4	4	4	4
1	1	6	3	2	2	2	1	4	1	2	1	3	3	4	3	2	2	1	2	1	2	4	4	4	4	4	4	4	4	4	4	4	4	4	4	4	4	4	4	4	4	4	4	3	4	4	4	4	4
1	1	6	3	2	2	2	1	4	1	3	1	3	3	4	3	2	2	1	2	1	2	4	4	4	4	4	4	4	4	4	4	4	4	4	4	4	4	4	4	4	4	4	4	4	4	4	4	4	4
1	1	6	3	2	2	2	1	4	1	3	1	3	3	4	3	2	2	2		1	2	4	4	4	4	4	4	4	3	4	1	4	4	4	2	4	1	1	1	4	4	4	4	4	4	4	4	4	4
1	1	6	3	2	2	2	1	4	1	3	1	3	3	4	1	1	2	2		1	2	4	4	4	3	4	4	4	4	1	4	4	4	4	4	4	4	4	4	4	1	1	4	4	4	4	2	4	4
1	1	6	3	2	2	2	1	4	1	3	1	3	3	2	4	2	2	2		1	4	4	1	4	4	4	4	3	4	4	1	1	4	4	4	1	4	4	4	4	4	4	1	2	4	4	4	4	4
1	1	6	3	2	2	2	1	4	1	2	1	3	3	4	3	2	2	2		1	3	4	4	4	4	4	4	4	4	4	4	4	4	4	4	4	4	4	4	4	4	4	4	4	4	4	4	4	4
1	1	6	3	2	2	2	1	2	1	2	1	3	5	4	4	2	2	2		1	3	4	4	4	4	4	4	4	4	4	4	4	4	4	4	4	4	2	4	4	4	4	4	4	4	4	4	4	4
1	1	6	3	2	2	2	1	4	4	2	1	3	3	4	3	2	2	2		1	3	1	1	4	4	4	1	4	2	4	3	4	4	4	1	4	4	4	2	4	4	2	4	4	4	4	4	4	4
1	1	6	3	1	2	2	1	1	1	4	1	3	3	4	3	2	2	2		1	3	4	4	4	4	4	4	4	4	4	4	4	4	4	4	4	1	4	4	4	4	4	4	1	4	4	4	4	4
1	1	6	3	1	2	2	1	1	1	2	1	3	3	3	3	2	2	2		1	3	4	4	1	4	4	4	4	4	1	4	4	1	1	1	1	1	1	1	1	2	1	1	1	4	4	4	1	4
1	1	6	3	1	2	2	2	1	1	2	1	3	3	4	3	2	2	2		1	3	4	4	4	4	4	4	2	4	4	4	2	4	4	4	4	4	4	4	4	4	4	2	4	4	4	4	4	4
1	1	6	3	1	2	2	1	1	1	2	1	3	5	4	3	2	2	2		1	3	4	4	4	4	4	1	4	4	4	4	4	4	4	4	4	4	4	4	4	4	1	4	4	3	4	4	4	4
1	1	6	3	1	2	2	1	1	4	2	1	3	3	4	3	2	2	2		1	3	4	2	4	4	4	4	4	2	4	4	4	4	4	4	1	4	1	2	4	4	4	4	2	4	4	4	4	4
1	1	6	3	2	2	2	1	4	4	2	1	3	3	4	3	2	2	1	3	1	4	2	4	4	4	4	4	4	4	4	2	4	4	4	4	4	4	4	4	4	4	4	4	4	4	4	4	4	4
1	1	6	3	1	2	2	1	1	1	2	1	3	3	4	3	2	2	2		1	4	4	4	4	4	4	1	4	4	4	1	4	2	2	2	2	1	2	2	2	1	2	1	2	4	4	4	4	4
1	1	6	3	1	2	2	1	1	1	2	1	3	3	3	3	2	2	2		1	4	1	1	4	4	4	4	4	4	2	4	4	4	4	4	4	4	4	4	4	4	4	4	4	4	4	4	4	4
1	1	6	3	2	2	2	3	4	1	2	1	3	5	4	4	2	2	2		1	4	4	4	4	4	4	4	4	1	4	4	4	4	4	4	4	4	4	4	4	4	4	4	1	4	4	4	4	4
1	1	6	3	1	2	2	1	1	1	2	1	3	3	4	3	2	2	2		1	1	4	4	4	4	4	4	3	4	4	4	4	4	4	4	4	2	4	4	4	4	2	4	4	4	4	4	4	4
1	1	6	3	1	2	2	1	1	1	3	1	3	3	4	3	2	2	2		1	2	4	4	4	4	4	4	4	4	2	4	4	4	4	4	4	4	1	2	4	4	4	4	4	4	4	2	4	4
1	1	6	3	1	2	2	1	1	1	3	1	3	3	4	3	2	2	2		1	2	4	3	4	4	4	4	4	1	4	1	4	4	4	4	4	4	4	4	4	2	4	4	4	4	4	4	4	4
1	1	6	3	1	2	2	1	1	1	3	1	3	3	4	3	2	2	2		1	2	4	4	4	4	4	4	4	4	4	1	1	4	4	1	4	4	4	4	4	4	4	2	2	4	4	4	4	4
1	1	6	3	1	2	2	1	4	1	3	1	3	3	3	4	2	2	1	3	1	3	4	4	4	4	4	4	4	4	4	4	4	4	4	4	4	4	2	4	4	4	4	4	4	4	4	4	4	4
1	1	6	3	2	2	2	1	4	1	3	1	3	3	4	4	2	2	1	3	1	3	1	4	3	4	4	3	4	4	4	4	4	4	4	4	2	2	4	4	4	4	4	4	4	4	4	4	4	4
1	1	6	3	1	2	2	1	2	1	2	1	3	3	4	3	2	2	1	3	1	3	2	2	4	4	4	4	4	4	4	4	4	1	1	1	1	1	1	2	1	1	1	1	1	4	4	4	4	4
1	1	6	3	1	2	2	3	1	1	2	1	3	3	4	3	2	2	1	3	2		4	1	4	4	4	4	1	4	4	2	4	4	4	4	4	4	4	4	4	3	4	1	4	4	4	4	4	4
1	1	6	3	1	2	2	1	4	1	1	1	3	5	4	3	2	2	2		2		4	4	4	3	4	4	4	4	1	4	4	4	4	4	4	4	4	4	4	4	1	4	4	4	4	4	4	4
1	1	6	3	1	2	2	1	1	1	2	1	3	3	4	3	2	2	2		2		4	4	4	4	4	4	4	4	4	4	2	4	4	4	4	4	4	4	4	4	4	4	1	4	4	4	4	4
1	1	6	3	2	2	2	2	4	1	2	1	3	3	4	1	1	2	2		1	4	4	4	4	3	4	4	4	4	4	4	4	4	4	2	4	4	1	4	4	4	4	4	4	4	4	4	4	4
1	1	6	3	1	2	2	1	1	1	2	1	3	3	4	1	1	2	2		2		4	4	4	4	4	1	4	4	4	4	4	4	4	4	4	1	4	4	4	1	4	4	4	4	4	4	4	4
1	1	6	3	1	2	2	1	1	1	1	1	3	3	4	1	1	2	2		2		4	2	4	4	4	4	4	4	4	1	4	4	4	4	2	4	4	4	4	4	4	1	4	2	4	4	4	4
1	1	6	3	1	2	2	1	1	1	4	1	3	5	4	1	1	2	2		2		4	4	4	4	4	3	4	1	4	4	4	4	4	4	4	4	4	4	4	4	4	4	4	4	4	4	1	4
1	1	6	3	1	2	2	1	1	1	2	1	3	3	3	1	1	2	2		2		3	4	4	4	4	4	4	4	4	4	4	4	4	4	4	4	1	4	4	4	1	4	1	4	4	4	4	4
1	1	6	3	1	2	2	1	1	4	2	1	3	3	4	1	1	2	2		2		4	4	4	3	4	1	3	4	4	4	4	4	4	4	4	4	4	4	4	4	4	4	4	4	4	4	4	4
1	1	6	3	2	2	2	1	4	1	4	1	3	5	4	3	2	2	2		1	4	4	4	4	4	4	4	4	4	4	3	2	4	4	4	4	4	4	4	4	2	4	4	4	4	4	4	4	4
1	1	6	3	1	2	2	1	1	4	2	1	3	3	3	2	2	2	2		2		3	4	4	4	4	4	4	4	2	4	4	4	4	4	4	1	1	4	4	4	4	4	4	4	4	2	4	4
1	1	6	3	1	2	2	1	1	4	2	1	3	5	4	2	2	2	2		1	3	4	4	4	4	4	4	4	4	4	4	4	4	4	4	2	4	4	4	4	4	2	1	4	4	4	4	4	4
1	1	6	3	1	2	2	1	1	4	3	1	3	3	4	2	2	2	2		1	3	4	4	4	4	4	4	3	1	4	4	4	4	4	1	4	4	4	4	4	4	4	4	1	4	4	4	4	4
1	1	6	3	1	2	2	1	1	4	2	1	3	3	4	2	2	2	2		1	3	4	4	1	4	4	3	4	4	4	4	4	4	4	4	4	4	4	4	4	4	4	4	4	4	4	4	4	4
1	1	6	3	2	2	2	2	4	4	2	1	3	5	4	2	2	2	1	4	1	3	4	3	4	4	4	4	4	4	4	4	4	4	4	4	4	4	2	4	4	4	4	4	4	4	4	4	4	4
1	1	6	3	1	2	2	1	1	4	3	1	3	3	4	2	2	2	2		2		2	4	4	3	4	1	4	4	1	4	4	4	4	4	4	1	4	4	4	1	2	4	4	4	4	4	4	4
1	1	6	3	1	2	2	1	1	4	2	1	3	3	4	2	2	2	2		2		4	2	4	4	4	4	4	4	4	4	4	4	4	4	4	4	4	4	4	4	4	1	4	4	4	4	4	4
1	1	6	3	1	2	2	1	1	4	2	1	3	5	4	3	2	2	2		2		4	4	4	4	4	4	4	4	4	3	4	4	4	4	4	4	4	4	4	4	4	4	4	4	4	4	4	4
1	1	6	3	1	2	2	2	4	1	3	1	3	5	4	3	2	2	2		1	4	1	3	4	4	4	4	3	4	4	4	4	4	4	2	4	4	2	4	4	4	4	4	1	4	4	4	4	4
1	1	6	3	2	2	2	1	4	4	2	1	3	5	4	3	2	2	2		2		4	4	4	4	4	4	4	1	4	4	4	2	2	2	2	2	2	2	2	2	2	2	2	4	4	4	4	4
1	1	4	2	1	1	4	1	1	1	1	1	3	3	4	3	2	1	1	4	1	3	4	4	4	3	4	2	4	4	1	4	2	4	4	4	4	4	4	4	4	4	4	4	4	4	4	4	4	4
1	1	4	4	2	1	4	2	1	1	2	1	3	3	4	4	3	1	2		1	2	4	4	1	4	4	3	4	4	4	4	4	4	4	4	4	4	4	4	4	4	4	4	4	4	4	4	4	4
1	1	4	1	1	1	4	1	1	1	3	1	3	3	4	2	2	1	2		1	3	2	4	1	4	4	4	4	4	3	4	4	4	4	4	4	4	4	4	4	4	4	2	4	2	2	2	2	4
1	1	4	3	2	1	4	1	4	1	2	1	3	3	4	2	2	1	2		1	2	4	2	1	4	4	4	4	4	4	4	4	4	4	1	2	4	4	4	4	4	4	4	2	2	2	2	2	4
1	1	4	4	1	1	4	1	1	4	3	1	3	3	4	2	2	1	1	3	1	3	4	2	1	4	4	4	4	4	1	4	4	4	4	4	4	1	4	4	4	4	4	4	4	2	2	2	2	4
1	1	3	4	1	2	2	1	1	1	3	1	3	3	4	4	3	2	2		1	4	4	4	1	4	2	4	2	4	4	4	1	4	4	4	4	4	1	4	4	4	4	4	4	2	2	2	2	4
1	1	3	4	1	2	2	1	1	1	3	1	3	3	4	4	3	2	1	4	1	4	4	4	1	4	2	1	4	4	4	4	2	4	4	4	4	4	4	4	4	4	4	4	4	2	2	2	2	4
1	1	3	3	1	2	2	1	1	1	3	1	3	3	4	2	2	2	2		1	4	4	4	1	4	2	4	4	4	4	4	3	4	4	4	4	4	4	4	4	4	4	1	4	2	2	2	2	4
1	1	3	2	2	2	2	1	4	1	2	1	3	3	3	3	3	2	2		2		4	4	1	4	4	2	4	1	4	4	4	4	4	4	2	1	2	4	4	4	4	4	1	2	2	2	2	4
1	1	3	1	2	2	2	1	1	1	2	1	3	3	4	3	3	2	1	4	2		2	4	4	4	4	4	4	4	4	4	4	4	4	4	4	4	4	4	4	4	4	4	3	2	2	2	2	4
[truncated: 12 more columns]
